# Supplementary material for: Simultaneous switching of two different CO2-switchable amines in the same solution
Source: Royal Society of Chemistry journal article supplement (doi:10.1039/d4cp00392f), 2024-01-01
Supplement: d4cp00392f2.xlsx [file d4cp00392f2.xlsx]

## Sheet: Introduction
TOOL FOR PREDICTING pH AND % PROTONATION
SUPPLEMENTARY MATERIAL FOR:
Simultaneous switching of two different CO2-switchable amines in the same solution
Matthew Sanger, Daniel Barker, and Philip G. Jessop
Each spreadsheet gives stepwise and colour-coded instructions in the upper right.
If a temperature other than 25 ˚C is intended, then change the values of KH, K1*, and Kw accordingly, and use temperature-appropriate pKaH values for the bases.
If a pressure other than 1 bar (0.1 MPa) is intended, then change the P(CO2) value before proceeding.

## Sheet: under air
TWO BASES IN WATER UNDER AIR
										Instructions
base X has a pKaH of	8			Calculator for % protonation					1	Enter pKaH of base X and Y into the respective cells (yellow cells)
base X has a KaH of	1e-08	M							2	Enter the nominal concentrations of bases X and Y (green cells)
base X has a nominal concentration of	0.01	M		pH	[H3O+]	% prot of X	% prot of Y		3	In the W column (orange cell), search for the value closest to zero. Then look across to the pH column and record the pH corresponding to that number
				10.98	1.04713e-11	0.00104603	0.0947874		4	In the blue cell, type in the pH you recorded in step 3. After this is done the % protonation will appear for X and Y in their resepective coloumns
base Y has a pKaH of	10
base Y has a KaH of	1e-10	M								Note
base Y has a nominal concentration of	0.01	M								If a non negative number does not appear in the W coloumn then set the first value in the pH column to a higher value
Kw =	1e-14	M2
delta pH	0.01
pH	[H3O+]	1st term	2nd term	3rd term	4th term	5th term	W
6	1e-06	1e-24	2e-20	1.0099e-22	-1.01e-28	-1e-32	2.0102e-20
6.01	9.77237e-07	9.12011e-25	1.86651e-20	9.64447e-23	-9.8701e-29	-1e-32	1.87625e-20
6.02	9.54993e-07	8.31764e-25	1.74193e-20	9.2104e-23	-9.64543e-29	-1e-32	1.75122e-20
6.03	9.33254e-07	7.58578e-25	1.62566e-20	8.79586e-23	-9.42587e-29	-1e-32	1.63453e-20
6.04	9.12011e-07	6.91831e-25	1.51716e-20	8.39998e-23	-9.21131e-29	-1e-32	1.52563e-20
6.05	8.91251e-07	6.30957e-25	1.41589e-20	8.02192e-23	-9.00163e-29	-1e-32	1.42398e-20
6.06	8.70964e-07	5.7544e-25	1.32139e-20	7.66088e-23	-8.79673e-29	-1e-32	1.32911e-20
6.07	8.51138e-07	5.24807e-25	1.23319e-20	7.31608e-23	-8.59649e-29	-1e-32	1.24056e-20
6.08	8.31764e-07	4.7863e-25	1.15088e-20	6.9868e-23	-8.40081e-29	-1e-32	1.15792e-20
6.09	8.12831e-07	4.36516e-25	1.07406e-20	6.67234e-23	-8.20959e-29	-1e-32	1.08078e-20
6.1	7.94328e-07	3.98107e-25	1.00237e-20	6.37204e-23	-8.02272e-29	-1e-32	1.00879e-20
6.11	7.76247e-07	3.63078e-25	9.35471e-21	6.08525e-23	-7.8401e-29	-1e-32	9.41592e-21
6.12	7.58578e-07	3.31131e-25	8.73032e-21	5.81137e-23	-7.66163e-29	-1e-32	8.78877e-21
6.13	7.4131e-07	3.01995e-25	8.14761e-21	5.54981e-23	-7.48723e-29	-1e-32	8.20341e-21
6.14	7.24436e-07	2.75423e-25	7.60379e-21	5.30003e-23	-7.3168e-29	-1e-32	7.65707e-21
6.15	7.07946e-07	2.51189e-25	7.09627e-21	5.06149e-23	-7.15025e-29	-1e-32	7.14714e-21
6.16	6.91831e-07	2.29087e-25	6.62263e-21	4.83369e-23	-6.98749e-29	-1e-32	6.67119e-21
6.17	6.76083e-07	2.0893e-25	6.18059e-21	4.61613e-23	-6.82844e-29	-1e-32	6.22696e-21
6.18	6.60693e-07	1.90546e-25	5.76807e-21	4.40837e-23	-6.673e-29	-1e-32	5.81234e-21
6.19	6.45654e-07	1.7378e-25	5.38307e-21	4.20996e-23	-6.52111e-29	-1e-32	5.42535e-21
6.2	6.30957e-07	1.58489e-25	5.02378e-21	4.02048e-23	-6.37267e-29	-1e-32	5.06414e-21
6.21	6.16595e-07	1.44544e-25	4.68846e-21	3.83953e-23	-6.22761e-29	-1e-32	4.727e-21
6.22	6.0256e-07	1.31826e-25	4.37553e-21	3.66673e-23	-6.08585e-29	-1e-32	4.41232e-21
6.23	5.88844e-07	1.20226e-25	4.08348e-21	3.5017e-23	-5.94732e-29	-1e-32	4.11862e-21
6.24	5.7544e-07	1.09648e-25	3.81092e-21	3.34409e-23	-5.81194e-29	-1e-32	3.84447e-21
6.25	5.62341e-07	1e-25	3.55656e-21	3.19358e-23	-5.67965e-29	-1e-32	3.5886e-21
6.26	5.49541e-07	9.12011e-26	3.31918e-21	3.04985e-23	-5.55036e-29	-1e-32	3.34977e-21
6.27	5.37032e-07	8.31764e-26	3.09763e-21	2.91258e-23	-5.42402e-29	-1e-32	3.12684e-21
6.28	5.24807e-07	7.58578e-26	2.89088e-21	2.7815e-23	-5.30056e-29	-1e-32	2.91877e-21
6.29	5.12861e-07	6.91831e-26	2.69793e-21	2.65631e-23	-5.1799e-29	-1e-32	2.72456e-21
6.3	5.01187e-07	6.30957e-26	2.51785e-21	2.53675e-23	-5.06199e-29	-1e-32	2.54328e-21
6.31	4.89779e-07	5.7544e-26	2.3498e-21	2.42258e-23	-4.94677e-29	-1e-32	2.37408e-21
6.32	4.7863e-07	5.24807e-26	2.19296e-21	2.31355e-23	-4.83416e-29	-1e-32	2.21615e-21
6.33	4.67735e-07	4.7863e-26	2.04659e-21	2.20942e-23	-4.72412e-29	-1e-32	2.06873e-21
6.34	4.57088e-07	4.36516e-26	1.90999e-21	2.10998e-23	-4.61659e-29	-1e-32	1.93113e-21
6.35	4.46684e-07	3.98107e-26	1.7825e-21	2.01502e-23	-4.5115e-29	-1e-32	1.80269e-21
6.36	4.36516e-07	3.63078e-26	1.66353e-21	1.92432e-23	-4.40881e-29	-1e-32	1.68281e-21
6.37	4.2658e-07	3.31131e-26	1.5525e-21	1.83772e-23	-4.30845e-29	-1e-32	1.57091e-21
6.38	4.16869e-07	3.01995e-26	1.44887e-21	1.75501e-23	-4.21038e-29	-1e-32	1.46645e-21
6.39	4.0738e-07	2.75423e-26	1.35217e-21	1.67602e-23	-4.11454e-29	-1e-32	1.36895e-21
6.4	3.98107e-07	2.51189e-26	1.26192e-21	1.60058e-23	-4.02088e-29	-1e-32	1.27795e-21
6.41	3.89045e-07	2.29087e-26	1.17769e-21	1.52855e-23	-3.92936e-29	-1e-32	1.193e-21
6.42	3.80189e-07	2.0893e-26	1.09908e-21	1.45975e-23	-3.83991e-29	-1e-32	1.1137e-21
6.43	3.71535e-07	1.90546e-26	1.02572e-21	1.39405e-23	-3.75251e-29	-1e-32	1.03968e-21
6.44	3.63078e-07	1.7378e-26	9.57261e-22	1.33131e-23	-3.66709e-29	-1e-32	9.70591e-22
6.45	3.54813e-07	1.58489e-26	8.93368e-22	1.27139e-23	-3.58362e-29	-1e-32	9.06097e-22
6.46	3.46737e-07	1.44544e-26	8.33739e-22	1.21417e-23	-3.50204e-29	-1e-32	8.45895e-22
6.47	3.38844e-07	1.31826e-26	7.78091e-22	1.15952e-23	-3.42233e-29	-1e-32	7.89699e-22
6.48	3.31131e-07	1.20226e-26	7.26156e-22	1.10733e-23	-3.34442e-29	-1e-32	7.37242e-22
6.49	3.23594e-07	1.09648e-26	6.77689e-22	1.0575e-23	-3.2683e-29	-1e-32	6.88275e-22
6.5	3.16228e-07	1e-26	6.32456e-22	1.0099e-23	-3.1939e-29	-1e-32	6.42565e-22
6.51	3.0903e-07	9.12011e-27	5.90242e-22	9.64447e-24	-3.1212e-29	-1e-32	5.99896e-22
6.52	3.01995e-07	8.31764e-27	5.50846e-22	9.2104e-24	-3.05015e-29	-1e-32	5.60065e-22
6.53	2.95121e-07	7.58578e-27	5.14079e-22	8.79586e-24	-2.98072e-29	-1e-32	5.22883e-22
6.54	2.88403e-07	6.91831e-27	4.79767e-22	8.39998e-24	-2.91287e-29	-1e-32	4.88174e-22
6.55	2.81838e-07	6.30957e-27	4.47744e-22	8.02192e-24	-2.84657e-29	-1e-32	4.55773e-22
6.56	2.75423e-07	5.7544e-27	4.17859e-22	7.66088e-24	-2.78177e-29	-1e-32	4.25526e-22
6.57	2.69153e-07	5.24807e-27	3.89969e-22	7.31608e-24	-2.71845e-29	-1e-32	3.9729e-22
6.58	2.63027e-07	4.7863e-27	3.6394e-22	6.9868e-24	-2.65657e-29	-1e-32	3.70932e-22
6.59	2.5704e-07	4.36516e-27	3.39649e-22	6.67234e-24	-2.5961e-29	-1e-32	3.46326e-22
6.6	2.51189e-07	3.98107e-27	3.16979e-22	6.37204e-24	-2.53701e-29	-1e-32	3.23355e-22
6.61	2.45471e-07	3.63078e-27	2.95822e-22	6.08525e-24	-2.47926e-29	-1e-32	3.01911e-22
6.62	2.39883e-07	3.31131e-27	2.76077e-22	5.81137e-24	-2.42282e-29	-1e-32	2.81892e-22
6.63	2.34423e-07	3.01995e-27	2.5765e-22	5.54981e-24	-2.36767e-29	-1e-32	2.63203e-22
6.64	2.29087e-07	2.75423e-27	2.40453e-22	5.30003e-24	-2.31378e-29	-1e-32	2.45756e-22
6.65	2.23872e-07	2.51189e-27	2.24404e-22	5.06149e-24	-2.26111e-29	-1e-32	2.29468e-22
6.66	2.18776e-07	2.29087e-27	2.09426e-22	4.83369e-24	-2.20964e-29	-1e-32	2.14262e-22
6.67	2.13796e-07	2.0893e-27	1.95448e-22	4.61613e-24	-2.15934e-29	-1e-32	2.00066e-22
6.68	2.0893e-07	1.90546e-27	1.82402e-22	4.40837e-24	-2.11019e-29	-1e-32	1.86813e-22
6.69	2.04174e-07	1.7378e-27	1.70228e-22	4.20996e-24	-2.06216e-29	-1e-32	1.74439e-22
6.7	1.99526e-07	1.58489e-27	1.58866e-22	4.02048e-24	-2.01521e-29	-1e-32	1.62888e-22
6.71	1.94984e-07	1.44544e-27	1.48262e-22	3.83953e-24	-1.96934e-29	-1e-32	1.52103e-22
6.72	1.90546e-07	1.31826e-27	1.38366e-22	3.66673e-24	-1.92452e-29	-1e-32	1.42034e-22
6.73	1.86209e-07	1.20226e-27	1.29131e-22	3.5017e-24	-1.88071e-29	-1e-32	1.32634e-22
6.74	1.8197e-07	1.09648e-27	1.20512e-22	3.34409e-24	-1.8379e-29	-1e-32	1.23857e-22
6.75	1.77828e-07	1e-27	1.12468e-22	3.19358e-24	-1.79606e-29	-1e-32	1.15663e-22
6.76	1.7378e-07	9.12011e-28	1.04962e-22	3.04985e-24	-1.75518e-29	-1e-32	1.08012e-22
6.77	1.69824e-07	8.31764e-28	9.79558e-23	2.91258e-24	-1.71523e-29	-1e-32	1.00869e-22
6.78	1.65959e-07	7.58578e-28	9.14177e-23	2.7815e-24	-1.67618e-29	-1e-32	9.41999e-23
6.79	1.62181e-07	6.91831e-28	8.53159e-23	2.65631e-24	-1.63803e-29	-1e-32	8.79729e-23
6.8	1.58489e-07	6.30957e-28	7.96215e-23	2.53675e-24	-1.60074e-29	-1e-32	8.21588e-23
6.81	1.54882e-07	5.7544e-28	7.43071e-23	2.42258e-24	-1.5643e-29	-1e-32	7.67302e-23
6.82	1.51356e-07	5.24807e-28	6.93474e-23	2.31355e-24	-1.5287e-29	-1e-32	7.16615e-23
6.83	1.47911e-07	4.7863e-28	6.47188e-23	2.20942e-24	-1.4939e-29	-1e-32	6.69286e-23
6.84	1.44544e-07	4.36516e-28	6.03991e-23	2.10998e-24	-1.45989e-29	-1e-32	6.25095e-23
6.85	1.41254e-07	3.98107e-28	5.63677e-23	2.01502e-24	-1.42666e-29	-1e-32	5.83831e-23
6.86	1.38038e-07	3.63078e-28	5.26054e-23	1.92432e-24	-1.39419e-29	-1e-32	5.45301e-23
6.87	1.34896e-07	3.31131e-28	4.90942e-23	1.83772e-24	-1.36245e-29	-1e-32	5.09322e-23
6.88	1.31826e-07	3.01995e-28	4.58174e-23	1.75501e-24	-1.33144e-29	-1e-32	4.75727e-23
6.89	1.28825e-07	2.75423e-28	4.27593e-23	1.67602e-24	-1.30113e-29	-1e-32	4.44355e-23
6.9	1.25893e-07	2.51189e-28	3.99053e-23	1.60058e-24	-1.27151e-29	-1e-32	4.15061e-23
6.91	1.23027e-07	2.29087e-28	3.72418e-23	1.52855e-24	-1.24257e-29	-1e-32	3.87705e-23
6.92	1.20226e-07	2.0893e-28	3.4756e-23	1.45975e-24	-1.21429e-29	-1e-32	3.6216e-23
6.93	1.1749e-07	1.90546e-28	3.24362e-23	1.39405e-24	-1.18665e-29	-1e-32	3.38304e-23
6.94	1.14815e-07	1.7378e-28	3.02712e-23	1.33131e-24	-1.15964e-29	-1e-32	3.16027e-23
6.95	1.12202e-07	1.58489e-28	2.82508e-23	1.27139e-24	-1.13324e-29	-1e-32	2.95223e-23
6.96	1.09648e-07	1.44544e-28	2.63651e-23	1.21417e-24	-1.10744e-29	-1e-32	2.75794e-23
6.97	1.07152e-07	1.31826e-28	2.46054e-23	1.15952e-24	-1.08223e-29	-1e-32	2.5765e-23
6.98	1.04713e-07	1.20226e-28	2.29631e-23	1.10733e-24	-1.0576e-29	-1e-32	2.40705e-23
6.99	1.02329e-07	1.09648e-28	2.14304e-23	1.0575e-24	-1.03353e-29	-1e-32	2.2488e-23
7	1e-07	1e-28	2e-23	1.0099e-24	-1.01e-29	-1e-32	2.101e-23
7.01	9.77237e-08	9.12011e-29	1.86651e-23	9.64447e-25	-9.8701e-30	-1e-32	1.96296e-23
7.02	9.54993e-08	8.31764e-29	1.74193e-23	9.2104e-25	-9.64543e-30	-1e-32	1.83404e-23
7.03	9.33254e-08	7.58578e-29	1.62566e-23	8.79586e-25	-9.42587e-30	-1e-32	1.71363e-23
7.04	9.12011e-08	6.91831e-29	1.51716e-23	8.39998e-25	-9.21131e-30	-1e-32	1.60116e-23
7.05	8.91251e-08	6.30957e-29	1.41589e-23	8.02192e-25	-9.00163e-30	-1e-32	1.49612e-23
7.06	8.70964e-08	5.7544e-29	1.32139e-23	7.66088e-25	-8.79673e-30	-1e-32	1.398e-23
7.07	8.51138e-08	5.24807e-29	1.23319e-23	7.31608e-25	-8.59649e-30	-1e-32	1.30636e-23
7.08	8.31764e-08	4.7863e-29	1.15088e-23	6.9868e-25	-8.40081e-30	-1e-32	1.22075e-23
7.09	8.12831e-08	4.36516e-29	1.07406e-23	6.67234e-25	-8.20959e-30	-1e-32	1.14079e-23
7.1	7.94328e-08	3.98107e-29	1.00237e-23	6.37204e-25	-8.02272e-30	-1e-32	1.0661e-23
7.11	7.76247e-08	3.63078e-29	9.35471e-24	6.08525e-25	-7.8401e-30	-1e-32	9.96326e-24
7.12	7.58578e-08	3.31131e-29	8.73032e-24	5.81137e-25	-7.66163e-30	-1e-32	9.31148e-24
7.13	7.4131e-08	3.01995e-29	8.14761e-24	5.54981e-25	-7.48723e-30	-1e-32	8.70261e-24
7.14	7.24436e-08	2.75423e-29	7.60379e-24	5.30003e-25	-7.3168e-30	-1e-32	8.13382e-24
7.15	7.07946e-08	2.51189e-29	7.09627e-24	5.06149e-25	-7.15025e-30	-1e-32	7.60244e-24
7.16	6.91831e-08	2.29087e-29	6.62263e-24	4.83369e-25	-6.98749e-30	-1e-32	7.10601e-24
7.17	6.76083e-08	2.0893e-29	6.18059e-24	4.61613e-25	-6.82844e-30	-1e-32	6.64222e-24
7.18	6.60693e-08	1.90546e-29	5.76807e-24	4.40837e-25	-6.673e-30	-1e-32	6.20892e-24
7.19	6.45654e-08	1.7378e-29	5.38307e-24	4.20996e-25	-6.52111e-30	-1e-32	5.80408e-24
7.2	6.30957e-08	1.58489e-29	5.02378e-24	4.02048e-25	-6.37267e-30	-1e-32	5.42583e-24
7.21	6.16595e-08	1.44544e-29	4.68846e-24	3.83953e-25	-6.22761e-30	-1e-32	5.07242e-24
7.22	6.0256e-08	1.31826e-29	4.37553e-24	3.66673e-25	-6.08585e-30	-1e-32	4.74221e-24
7.23	5.88844e-08	1.20226e-29	4.08348e-24	3.5017e-25	-5.94732e-30	-1e-32	4.43365e-24
7.24	5.7544e-08	1.09648e-29	3.81092e-24	3.34409e-25	-5.81194e-30	-1e-32	4.14534e-24
7.25	5.62341e-08	1e-29	3.55656e-24	3.19358e-25	-5.67965e-30	-1e-32	3.87592e-24
7.26	5.49541e-08	9.12011e-30	3.31918e-24	3.04985e-25	-5.55036e-30	-1e-32	3.62416e-24
7.27	5.37032e-08	8.31764e-30	3.09763e-24	2.91258e-25	-5.42402e-30	-1e-32	3.3889e-24
7.28	5.24807e-08	7.58578e-30	2.89088e-24	2.7815e-25	-5.30056e-30	-1e-32	3.16903e-24
7.29	5.12861e-08	6.91831e-30	2.69793e-24	2.65631e-25	-5.1799e-30	-1e-32	2.96356e-24
7.3	5.01187e-08	6.30957e-30	2.51785e-24	2.53675e-25	-5.06199e-30	-1e-32	2.77153e-24
7.31	4.89779e-08	5.7544e-30	2.3498e-24	2.42258e-25	-4.94677e-30	-1e-32	2.59206e-24
7.32	4.7863e-08	5.24807e-30	2.19296e-24	2.31355e-25	-4.83416e-30	-1e-32	2.42431e-24
7.33	4.67735e-08	4.7863e-30	2.04659e-24	2.20942e-25	-4.72412e-30	-1e-32	2.26753e-24
7.34	4.57088e-08	4.36516e-30	1.90999e-24	2.10998e-25	-4.61659e-30	-1e-32	2.12098e-24
7.35	4.46684e-08	3.98107e-30	1.7825e-24	2.01502e-25	-4.5115e-30	-1e-32	1.984e-24
7.36	4.36516e-08	3.63078e-30	1.66353e-24	1.92432e-25	-4.40881e-30	-1e-32	1.85596e-24
7.37	4.2658e-08	3.31131e-30	1.5525e-24	1.83772e-25	-4.30845e-30	-1e-32	1.73627e-24
7.38	4.16869e-08	3.01995e-30	1.44887e-24	1.75501e-25	-4.21038e-30	-1e-32	1.62437e-24
7.39	4.0738e-08	2.75423e-30	1.35217e-24	1.67602e-25	-4.11454e-30	-1e-32	1.51977e-24
7.4	3.98107e-08	2.51189e-30	1.26192e-24	1.60058e-25	-4.02088e-30	-1e-32	1.42197e-24
7.41	3.89045e-08	2.29087e-30	1.17769e-24	1.52855e-25	-3.92936e-30	-1e-32	1.33054e-24
7.42	3.80189e-08	2.0893e-30	1.09908e-24	1.45975e-25	-3.83991e-30	-1e-32	1.24506e-24
7.43	3.71535e-08	1.90546e-30	1.02572e-24	1.39405e-25	-3.75251e-30	-1e-32	1.16513e-24
7.44	3.63078e-08	1.7378e-30	9.57261e-25	1.33131e-25	-3.66709e-30	-1e-32	1.09039e-24
7.45	3.54813e-08	1.58489e-30	8.93368e-25	1.27139e-25	-3.58362e-30	-1e-32	1.0205e-24
7.46	3.46737e-08	1.44544e-30	8.33739e-25	1.21417e-25	-3.50204e-30	-1e-32	9.55154e-25
7.47	3.38844e-08	1.31826e-30	7.78091e-25	1.15952e-25	-3.42233e-30	-1e-32	8.94041e-25
7.48	3.31131e-08	1.20226e-30	7.26156e-25	1.10733e-25	-3.34442e-30	-1e-32	8.36888e-25
7.49	3.23594e-08	1.09648e-30	6.77689e-25	1.0575e-25	-3.2683e-30	-1e-32	7.83436e-25
7.5	3.16228e-08	1e-30	6.32456e-25	1.0099e-25	-3.1939e-30	-1e-32	7.33444e-25
7.51	3.0903e-08	9.12011e-31	5.90242e-25	9.64447e-26	-3.1212e-30	-1e-32	6.86685e-25
7.52	3.01995e-08	8.31764e-31	5.50846e-25	9.2104e-26	-3.05015e-30	-1e-32	6.42948e-25
7.53	2.95121e-08	7.58578e-31	5.14079e-25	8.79586e-26	-2.98072e-30	-1e-32	6.02036e-25
7.54	2.88403e-08	6.91831e-31	4.79767e-25	8.39998e-26	-2.91287e-30	-1e-32	5.63764e-25
7.55	2.81838e-08	6.30957e-31	4.47744e-25	8.02192e-26	-2.84657e-30	-1e-32	5.27961e-25
7.56	2.75423e-08	5.7544e-31	4.17859e-25	7.66088e-26	-2.78177e-30	-1e-32	4.94466e-25
7.57	2.69153e-08	5.24807e-31	3.89969e-25	7.31608e-26	-2.71845e-30	-1e-32	4.63128e-25
7.58	2.63027e-08	4.7863e-31	3.6394e-25	6.9868e-26	-2.65657e-30	-1e-32	4.33806e-25
7.59	2.5704e-08	4.36516e-31	3.39649e-25	6.67234e-26	-2.5961e-30	-1e-32	4.0637e-25
7.6	2.51189e-08	3.98107e-31	3.16979e-25	6.37204e-26	-2.53701e-30	-1e-32	3.80697e-25
7.61	2.45471e-08	3.63078e-31	2.95822e-25	6.08525e-26	-2.47926e-30	-1e-32	3.56672e-25
7.62	2.39883e-08	3.31131e-31	2.76077e-25	5.81137e-26	-2.42282e-30	-1e-32	3.34189e-25
7.63	2.34423e-08	3.01995e-31	2.5765e-25	5.54981e-26	-2.36767e-30	-1e-32	3.13146e-25
7.64	2.29087e-08	2.75423e-31	2.40453e-25	5.30003e-26	-2.31378e-30	-1e-32	2.93451e-25
7.65	2.23872e-08	2.51189e-31	2.24404e-25	5.06149e-26	-2.26111e-30	-1e-32	2.75017e-25
7.66	2.18776e-08	2.29087e-31	2.09426e-25	4.83369e-26	-2.20964e-30	-1e-32	2.57761e-25
7.67	2.13796e-08	2.0893e-31	1.95448e-25	4.61613e-26	-2.15934e-30	-1e-32	2.41607e-25
7.68	2.0893e-08	1.90546e-31	1.82402e-25	4.40837e-26	-2.11019e-30	-1e-32	2.26484e-25
7.69	2.04174e-08	1.7378e-31	1.70228e-25	4.20996e-26	-2.06216e-30	-1e-32	2.12325e-25
7.7	1.99526e-08	1.58489e-31	1.58866e-25	4.02048e-26	-2.01521e-30	-1e-32	1.99069e-25
7.71	1.94984e-08	1.44544e-31	1.48262e-25	3.83953e-26	-1.96934e-30	-1e-32	1.86656e-25
7.72	1.90546e-08	1.31826e-31	1.38366e-25	3.66673e-26	-1.92452e-30	-1e-32	1.75032e-25
7.73	1.86209e-08	1.20226e-31	1.29131e-25	3.5017e-26	-1.88071e-30	-1e-32	1.64146e-25
7.74	1.8197e-08	1.09648e-31	1.20512e-25	3.34409e-26	-1.8379e-30	-1e-32	1.53951e-25
7.75	1.77828e-08	1e-31	1.12468e-25	3.19358e-26	-1.79606e-30	-1e-32	1.44402e-25
7.76	1.7378e-08	9.12011e-32	1.04962e-25	3.04985e-26	-1.75518e-30	-1e-32	1.35458e-25
7.77	1.69824e-08	8.31764e-32	9.79558e-26	2.91258e-26	-1.71523e-30	-1e-32	1.2708e-25
7.78	1.65959e-08	7.58578e-32	9.14177e-26	2.7815e-26	-1.67618e-30	-1e-32	1.19231e-25
7.79	1.62181e-08	6.91831e-32	8.53159e-26	2.65631e-26	-1.63803e-30	-1e-32	1.11877e-25
7.8	1.58489e-08	6.30957e-32	7.96215e-26	2.53675e-26	-1.60074e-30	-1e-32	1.04987e-25
7.81	1.54882e-08	5.7544e-32	7.43071e-26	2.42258e-26	-1.5643e-30	-1e-32	9.85314e-26
7.82	1.51356e-08	5.24807e-32	6.93474e-26	2.31355e-26	-1.5287e-30	-1e-32	9.24814e-26
7.83	1.47911e-08	4.7863e-32	6.47188e-26	2.20942e-26	-1.4939e-30	-1e-32	8.68115e-26
7.84	1.44544e-08	4.36516e-32	6.03991e-26	2.10998e-26	-1.45989e-30	-1e-32	8.14974e-26
7.85	1.41254e-08	3.98107e-32	5.63677e-26	2.01502e-26	-1.42666e-30	-1e-32	7.65164e-26
7.86	1.38038e-08	3.63078e-32	5.26054e-26	1.92432e-26	-1.39419e-30	-1e-32	7.18473e-26
7.87	1.34896e-08	3.31131e-32	4.90942e-26	1.83772e-26	-1.36245e-30	-1e-32	6.747e-26
7.88	1.31826e-08	3.01995e-32	4.58174e-26	1.75501e-26	-1.33144e-30	-1e-32	6.33661e-26
7.89	1.28825e-08	2.75423e-32	4.27593e-26	1.67602e-26	-1.30113e-30	-1e-32	5.95181e-26
7.9	1.25893e-08	2.51189e-32	3.99053e-26	1.60058e-26	-1.27151e-30	-1e-32	5.59098e-26
7.91	1.23027e-08	2.29087e-32	3.72418e-26	1.52855e-26	-1.24257e-30	-1e-32	5.2526e-26
7.92	1.20226e-08	2.0893e-32	3.4756e-26	1.45975e-26	-1.21429e-30	-1e-32	4.93523e-26
7.93	1.1749e-08	1.90546e-32	3.24362e-26	1.39405e-26	-1.18665e-30	-1e-32	4.63755e-26
7.94	1.14815e-08	1.7378e-32	3.02712e-26	1.33131e-26	-1.15964e-30	-1e-32	4.35832e-26
7.95	1.12202e-08	1.58489e-32	2.82508e-26	1.27139e-26	-1.13324e-30	-1e-32	4.09635e-26
7.96	1.09648e-08	1.44544e-32	2.63651e-26	1.21417e-26	-1.10744e-30	-1e-32	3.85057e-26
7.97	1.07152e-08	1.31826e-32	2.46054e-26	1.15952e-26	-1.08223e-30	-1e-32	3.61995e-26
7.98	1.04713e-08	1.20226e-32	2.29631e-26	1.10733e-26	-1.0576e-30	-1e-32	3.40354e-26
7.99	1.02329e-08	1.09648e-32	2.14304e-26	1.0575e-26	-1.03353e-30	-1e-32	3.20043e-26
8	1e-08	1e-32	2e-26	1.0099e-26	-1.01e-30	-1e-32	3.0098e-26
8.01	9.77237e-09	9.12011e-33	1.86651e-26	9.64447e-27	-9.8701e-31	-1e-32	2.83086e-26
8.02	9.54993e-09	8.31764e-33	1.74193e-26	9.2104e-27	-9.64543e-31	-1e-32	2.66287e-26
8.03	9.33254e-09	7.58578e-33	1.62566e-26	8.79586e-27	-9.42587e-31	-1e-32	2.50515e-26
8.04	9.12011e-09	6.91831e-33	1.51716e-26	8.39998e-27	-9.21131e-31	-1e-32	2.35706e-26
8.05	8.91251e-09	6.30957e-33	1.41589e-26	8.02192e-27	-9.00163e-31	-1e-32	2.21799e-26
8.06	8.70964e-09	5.7544e-33	1.32139e-26	7.66088e-27	-8.79673e-31	-1e-32	2.08739e-26
8.07	8.51138e-09	5.24807e-33	1.23319e-26	7.31608e-27	-8.59649e-31	-1e-32	1.96471e-26
8.08	8.31764e-09	4.7863e-33	1.15088e-26	6.9868e-27	-8.40081e-31	-1e-32	1.84948e-26
8.09	8.12831e-09	4.36516e-33	1.07406e-26	6.67234e-27	-8.20959e-31	-1e-32	1.74122e-26
8.1	7.94328e-09	3.98107e-33	1.00237e-26	6.37204e-27	-8.02272e-31	-1e-32	1.6395e-26
8.11	7.76247e-09	3.63078e-33	9.35471e-27	6.08525e-27	-7.8401e-31	-1e-32	1.54392e-26
8.12	7.58578e-09	3.31131e-33	8.73032e-27	5.81137e-27	-7.66163e-31	-1e-32	1.45409e-26
8.13	7.4131e-09	3.01995e-33	8.14761e-27	5.54981e-27	-7.48723e-31	-1e-32	1.36967e-26
8.14	7.24436e-09	2.75423e-33	7.60379e-27	5.30003e-27	-7.3168e-31	-1e-32	1.29031e-26
8.15	7.07946e-09	2.51189e-33	7.09627e-27	5.06149e-27	-7.15025e-31	-1e-32	1.2157e-26
8.16	6.91831e-09	2.29087e-33	6.62263e-27	4.83369e-27	-6.98749e-31	-1e-32	1.14556e-26
8.17	6.76083e-09	2.0893e-33	6.18059e-27	4.61613e-27	-6.82844e-31	-1e-32	1.0796e-26
8.18	6.60693e-09	1.90546e-33	5.76807e-27	4.40837e-27	-6.673e-31	-1e-32	1.01758e-26
8.19	6.45654e-09	1.7378e-33	5.38307e-27	4.20996e-27	-6.52111e-31	-1e-32	9.59238e-27
8.2	6.30957e-09	1.58489e-33	5.02378e-27	4.02048e-27	-6.37267e-31	-1e-32	9.04361e-27
8.21	6.16595e-09	1.44544e-33	4.68846e-27	3.83953e-27	-6.22761e-31	-1e-32	8.52736e-27
8.22	6.0256e-09	1.31826e-33	4.37553e-27	3.66673e-27	-6.08585e-31	-1e-32	8.04163e-27
8.23	5.88844e-09	1.20226e-33	4.08348e-27	3.5017e-27	-5.94732e-31	-1e-32	7.58457e-27
8.24	5.7544e-09	1.09648e-33	3.81092e-27	3.34409e-27	-5.81194e-31	-1e-32	7.15443e-27
8.25	5.62341e-09	1e-33	3.55656e-27	3.19358e-27	-5.67965e-31	-1e-32	6.74957e-27
8.26	5.49541e-09	9.12011e-34	3.31918e-27	3.04985e-27	-5.55036e-31	-1e-32	6.36846e-27
8.27	5.37032e-09	8.31764e-34	3.09763e-27	2.91258e-27	-5.42402e-31	-1e-32	6.00967e-27
8.28	5.24807e-09	7.58578e-34	2.89088e-27	2.7815e-27	-5.30056e-31	-1e-32	5.67184e-27
8.29	5.12861e-09	6.91831e-34	2.69793e-27	2.65631e-27	-5.1799e-31	-1e-32	5.35371e-27
8.3	5.01187e-09	6.30957e-34	2.51785e-27	2.53675e-27	-5.06199e-31	-1e-32	5.05409e-27
8.31	4.89779e-09	5.7544e-34	2.3498e-27	2.42258e-27	-4.94677e-31	-1e-32	4.77187e-27
8.32	4.7863e-09	5.24807e-34	2.19296e-27	2.31355e-27	-4.83416e-31	-1e-32	4.50601e-27
8.33	4.67735e-09	4.7863e-34	2.04659e-27	2.20942e-27	-4.72412e-31	-1e-32	4.25553e-27
8.34	4.57088e-09	4.36516e-34	1.90999e-27	2.10998e-27	-4.61659e-31	-1e-32	4.0195e-27
8.35	4.46684e-09	3.98107e-34	1.7825e-27	2.01502e-27	-4.5115e-31	-1e-32	3.79706e-27
8.36	4.36516e-09	3.63078e-34	1.66353e-27	1.92432e-27	-4.40881e-31	-1e-32	3.5874e-27
8.37	4.2658e-09	3.31131e-34	1.5525e-27	1.83772e-27	-4.30845e-31	-1e-32	3.38977e-27
8.38	4.16869e-09	3.01995e-34	1.44887e-27	1.75501e-27	-4.21038e-31	-1e-32	3.20345e-27
8.39	4.0738e-09	2.75423e-34	1.35217e-27	1.67602e-27	-4.11454e-31	-1e-32	3.02776e-27
8.4	3.98107e-09	2.51189e-34	1.26192e-27	1.60058e-27	-4.02088e-31	-1e-32	2.86209e-27
8.41	3.89045e-09	2.29087e-34	1.17769e-27	1.52855e-27	-3.92936e-31	-1e-32	2.70583e-27
8.42	3.80189e-09	2.0893e-34	1.09908e-27	1.45975e-27	-3.83991e-31	-1e-32	2.55844e-27
8.43	3.71535e-09	1.90546e-34	1.02572e-27	1.39405e-27	-3.75251e-31	-1e-32	2.41939e-27
8.44	3.63078e-09	1.7378e-34	9.57261e-28	1.33131e-27	-3.66709e-31	-1e-32	2.28819e-27
8.45	3.54813e-09	1.58489e-34	8.93368e-28	1.27139e-27	-3.58362e-31	-1e-32	2.16439e-27
8.46	3.46737e-09	1.44544e-34	8.33739e-28	1.21417e-27	-3.50204e-31	-1e-32	2.04755e-27
8.47	3.38844e-09	1.31826e-34	7.78091e-28	1.15952e-27	-3.42233e-31	-1e-32	1.93726e-27
8.48	3.31131e-09	1.20226e-34	7.26156e-28	1.10733e-27	-3.34442e-31	-1e-32	1.83315e-27
8.49	3.23594e-09	1.09648e-34	6.77689e-28	1.0575e-27	-3.2683e-31	-1e-32	1.73485e-27
8.5	3.16228e-09	1e-34	6.32456e-28	1.0099e-27	-3.1939e-31	-1e-32	1.64203e-27
8.51	3.0903e-09	9.12011e-35	5.90242e-28	9.64447e-28	-3.1212e-31	-1e-32	1.55437e-27
8.52	3.01995e-09	8.31764e-35	5.50846e-28	9.2104e-28	-3.05015e-31	-1e-32	1.47157e-27
8.53	2.95121e-09	7.58578e-35	5.14079e-28	8.79586e-28	-2.98072e-31	-1e-32	1.39336e-27
8.54	2.88403e-09	6.91831e-35	4.79767e-28	8.39998e-28	-2.91287e-31	-1e-32	1.31946e-27
8.55	2.81838e-09	6.30957e-35	4.47744e-28	8.02192e-28	-2.84657e-31	-1e-32	1.24964e-27
8.56	2.75423e-09	5.7544e-35	4.17859e-28	7.66088e-28	-2.78177e-31	-1e-32	1.18366e-27
8.57	2.69153e-09	5.24807e-35	3.89969e-28	7.31608e-28	-2.71845e-31	-1e-32	1.1213e-27
8.58	2.63027e-09	4.7863e-35	3.6394e-28	6.9868e-28	-2.65657e-31	-1e-32	1.06234e-27
8.59	2.5704e-09	4.36516e-35	3.39649e-28	6.67234e-28	-2.5961e-31	-1e-32	1.00661e-27
8.6	2.51189e-09	3.98107e-35	3.16979e-28	6.37204e-28	-2.53701e-31	-1e-32	9.53919e-28
8.61	2.45471e-09	3.63078e-35	2.95822e-28	6.08525e-28	-2.47926e-31	-1e-32	9.04089e-28
8.62	2.39883e-09	3.31131e-35	2.76077e-28	5.81137e-28	-2.42282e-31	-1e-32	8.56962e-28
8.63	2.34423e-09	3.01995e-35	2.5765e-28	5.54981e-28	-2.36767e-31	-1e-32	8.12385e-28
8.64	2.29087e-09	2.75423e-35	2.40453e-28	5.30003e-28	-2.31378e-31	-1e-32	7.70215e-28
8.65	2.23872e-09	2.51189e-35	2.24404e-28	5.06149e-28	-2.26111e-31	-1e-32	7.30317e-28
8.66	2.18776e-09	2.29087e-35	2.09426e-28	4.83369e-28	-2.20964e-31	-1e-32	6.92563e-28
8.67	2.13796e-09	2.0893e-35	1.95448e-28	4.61613e-28	-2.15934e-31	-1e-32	6.56835e-28
8.68	2.0893e-09	1.90546e-35	1.82402e-28	4.40837e-28	-2.11019e-31	-1e-32	6.23019e-28
8.69	2.04174e-09	1.7378e-35	1.70228e-28	4.20996e-28	-2.06216e-31	-1e-32	5.91008e-28
8.7	1.99526e-09	1.58489e-35	1.58866e-28	4.02048e-28	-2.01521e-31	-1e-32	5.60703e-28
8.71	1.94984e-09	1.44544e-35	1.48262e-28	3.83953e-28	-1.96934e-31	-1e-32	5.32008e-28
8.72	1.90546e-09	1.31826e-35	1.38366e-28	3.66673e-28	-1.92452e-31	-1e-32	5.04836e-28
8.73	1.86209e-09	1.20226e-35	1.29131e-28	3.5017e-28	-1.88071e-31	-1e-32	4.79102e-28
8.74	1.8197e-09	1.09648e-35	1.20512e-28	3.34409e-28	-1.8379e-31	-1e-32	4.54728e-28
8.75	1.77828e-09	1e-35	1.12468e-28	3.19358e-28	-1.79606e-31	-1e-32	4.31637e-28
8.76	1.7378e-09	9.12011e-36	1.04962e-28	3.04985e-28	-1.75518e-31	-1e-32	4.09761e-28
8.77	1.69824e-09	8.31764e-36	9.79558e-29	2.91258e-28	-1.71523e-31	-1e-32	3.89033e-28
8.78	1.65959e-09	7.58578e-36	9.14177e-29	2.7815e-28	-1.67618e-31	-1e-32	3.6939e-28
8.79	1.62181e-09	6.91831e-36	8.53159e-29	2.65631e-28	-1.63803e-31	-1e-32	3.50773e-28
8.8	1.58489e-09	6.30957e-36	7.96215e-29	2.53675e-28	-1.60074e-31	-1e-32	3.33127e-28
8.81	1.54882e-09	5.7544e-36	7.43071e-29	2.42258e-28	-1.5643e-31	-1e-32	3.16399e-28
8.82	1.51356e-09	5.24807e-36	6.93474e-29	2.31355e-28	-1.5287e-31	-1e-32	3.00539e-28
8.83	1.47911e-09	4.7863e-36	6.47188e-29	2.20942e-28	-1.4939e-31	-1e-32	2.85501e-28
8.84	1.44544e-09	4.36516e-36	6.03991e-29	2.10998e-28	-1.45989e-31	-1e-32	2.71241e-28
8.85	1.41254e-09	3.98107e-36	5.63677e-29	2.01502e-28	-1.42666e-31	-1e-32	2.57717e-28
8.86	1.38038e-09	3.63078e-36	5.26054e-29	1.92432e-28	-1.39419e-31	-1e-32	2.44888e-28
8.87	1.34896e-09	3.31131e-36	4.90942e-29	1.83772e-28	-1.36245e-31	-1e-32	2.3272e-28
8.88	1.31826e-09	3.01995e-36	4.58174e-29	1.75501e-28	-1.33144e-31	-1e-32	2.21175e-28
8.89	1.28825e-09	2.75423e-36	4.27593e-29	1.67602e-28	-1.30113e-31	-1e-32	2.10221e-28
8.9	1.25893e-09	2.51189e-36	3.99053e-29	1.60058e-28	-1.27151e-31	-1e-32	1.99826e-28
8.91	1.23027e-09	2.29087e-36	3.72418e-29	1.52855e-28	-1.24257e-31	-1e-32	1.89962e-28
8.92	1.20226e-09	2.0893e-36	3.4756e-29	1.45975e-28	-1.21429e-31	-1e-32	1.806e-28
8.93	1.1749e-09	1.90546e-36	3.24362e-29	1.39405e-28	-1.18665e-31	-1e-32	1.71713e-28
8.94	1.14815e-09	1.7378e-36	3.02712e-29	1.33131e-28	-1.15964e-31	-1e-32	1.63276e-28
8.95	1.12202e-09	1.58489e-36	2.82508e-29	1.27139e-28	-1.13324e-31	-1e-32	1.55266e-28
8.96	1.09648e-09	1.44544e-36	2.63651e-29	1.21417e-28	-1.10744e-31	-1e-32	1.47661e-28
8.97	1.07152e-09	1.31826e-36	2.46054e-29	1.15952e-28	-1.08223e-31	-1e-32	1.40439e-28
8.98	1.04713e-09	1.20226e-36	2.29631e-29	1.10733e-28	-1.0576e-31	-1e-32	1.33581e-28
8.99	1.02329e-09	1.09648e-36	2.14304e-29	1.0575e-28	-1.03353e-31	-1e-32	1.27067e-28
9	1e-09	1e-36	2e-29	1.0099e-28	-1.01e-31	-1e-32	1.20879e-28
9.01	9.77237e-10	9.12011e-37	1.86651e-29	9.64447e-29	-9.8701e-32	-1e-32	1.15001e-28
9.02	9.54993e-10	8.31764e-37	1.74193e-29	9.2104e-29	-9.64543e-32	-1e-32	1.09417e-28
9.03	9.33254e-10	7.58578e-37	1.62566e-29	8.79586e-29	-9.42587e-32	-1e-32	1.04111e-28
9.04	9.12011e-10	6.91831e-37	1.51716e-29	8.39998e-29	-9.21131e-32	-1e-32	9.90693e-29
9.05	8.91251e-10	6.30957e-37	1.41589e-29	8.02192e-29	-9.00163e-32	-1e-32	9.42781e-29
9.06	8.70964e-10	5.7544e-37	1.32139e-29	7.66088e-29	-8.79673e-32	-1e-32	8.97247e-29
9.07	8.51138e-10	5.24807e-37	1.23319e-29	7.31608e-29	-8.59649e-32	-1e-32	8.53967e-29
9.08	8.31764e-10	4.7863e-37	1.15088e-29	6.9868e-29	-8.40081e-32	-1e-32	8.12828e-29
9.09	8.12831e-10	4.36516e-37	1.07406e-29	6.67234e-29	-8.20959e-32	-1e-32	7.7372e-29
9.1	7.94328e-10	3.98107e-37	1.00237e-29	6.37204e-29	-8.02272e-32	-1e-32	7.36539e-29
9.11	7.76247e-10	3.63078e-37	9.35471e-30	6.08525e-29	-7.8401e-32	-1e-32	7.01188e-29
9.12	7.58578e-10	3.31131e-37	8.73032e-30	5.81137e-29	-7.66163e-32	-1e-32	6.67574e-29
9.13	7.4131e-10	3.01995e-37	8.14761e-30	5.54981e-29	-7.48723e-32	-1e-32	6.35609e-29
9.14	7.24436e-10	2.75423e-37	7.60379e-30	5.30003e-29	-7.3168e-32	-1e-32	6.05209e-29
9.15	7.07946e-10	2.51189e-37	7.09627e-30	5.06149e-29	-7.15025e-32	-1e-32	5.76297e-29
9.16	6.91831e-10	2.29087e-37	6.62263e-30	4.83369e-29	-6.98749e-32	-1e-32	5.48796e-29
9.17	6.76083e-10	2.0893e-37	6.18059e-30	4.61613e-29	-6.82844e-32	-1e-32	5.22636e-29
9.18	6.60693e-10	1.90546e-37	5.76807e-30	4.40837e-29	-6.673e-32	-1e-32	4.97751e-29
9.19	6.45654e-10	1.7378e-37	5.38307e-30	4.20996e-29	-6.52111e-32	-1e-32	4.74075e-29
9.2	6.30957e-10	1.58489e-37	5.02378e-30	4.02048e-29	-6.37267e-32	-1e-32	4.51549e-29
9.21	6.16595e-10	1.44544e-37	4.68846e-30	3.83953e-29	-6.22761e-32	-1e-32	4.30115e-29
9.22	6.0256e-10	1.31826e-37	4.37553e-30	3.66673e-29	-6.08585e-32	-1e-32	4.09719e-29
9.23	5.88844e-10	1.20226e-37	4.08348e-30	3.5017e-29	-5.94732e-32	-1e-32	3.9031e-29
9.24	5.7544e-10	1.09648e-37	3.81092e-30	3.34409e-29	-5.81194e-32	-1e-32	3.71837e-29
9.25	5.62341e-10	1e-37	3.55656e-30	3.19358e-29	-5.67965e-32	-1e-32	3.54256e-29
9.26	5.49541e-10	9.12011e-38	3.31918e-30	3.04985e-29	-5.55036e-32	-1e-32	3.37522e-29
9.27	5.37032e-10	8.31764e-38	3.09763e-30	2.91258e-29	-5.42402e-32	-1e-32	3.21592e-29
9.28	5.24807e-10	7.58578e-38	2.89088e-30	2.7815e-29	-5.30056e-32	-1e-32	3.06428e-29
9.29	5.12861e-10	6.91831e-38	2.69793e-30	2.65631e-29	-5.1799e-32	-1e-32	2.91992e-29
9.3	5.01187e-10	6.30957e-38	2.51785e-30	2.53675e-29	-5.06199e-32	-1e-32	2.78248e-29
9.31	4.89779e-10	5.7544e-38	2.3498e-30	2.42258e-29	-4.94677e-32	-1e-32	2.65161e-29
9.32	4.7863e-10	5.24807e-38	2.19296e-30	2.31355e-29	-4.83416e-32	-1e-32	2.52701e-29
9.33	4.67735e-10	4.7863e-38	2.04659e-30	2.20942e-29	-4.72412e-32	-1e-32	2.40836e-29
9.34	4.57088e-10	4.36516e-38	1.90999e-30	2.10998e-29	-4.61659e-32	-1e-32	2.29536e-29
9.35	4.46684e-10	3.98107e-38	1.7825e-30	2.01502e-29	-4.5115e-32	-1e-32	2.18775e-29
9.36	4.36516e-10	3.63078e-38	1.66353e-30	1.92432e-29	-4.40881e-32	-1e-32	2.08527e-29
9.37	4.2658e-10	3.31131e-38	1.5525e-30	1.83772e-29	-4.30845e-32	-1e-32	1.98766e-29
9.38	4.16869e-10	3.01995e-38	1.44887e-30	1.75501e-29	-4.21038e-32	-1e-32	1.89468e-29
9.39	4.0738e-10	2.75423e-38	1.35217e-30	1.67602e-29	-4.11454e-32	-1e-32	1.80612e-29
9.4	3.98107e-10	2.51189e-38	1.26192e-30	1.60058e-29	-4.02088e-32	-1e-32	1.72175e-29
9.41	3.89045e-10	2.29087e-38	1.17769e-30	1.52855e-29	-3.92936e-32	-1e-32	1.64138e-29
9.42	3.80189e-10	2.0893e-38	1.09908e-30	1.45975e-29	-3.83991e-32	-1e-32	1.56482e-29
9.43	3.71535e-10	1.90546e-38	1.02572e-30	1.39405e-29	-3.75251e-32	-1e-32	1.49187e-29
9.44	3.63078e-10	1.7378e-38	9.57261e-31	1.33131e-29	-3.66709e-32	-1e-32	1.42237e-29
9.45	3.54813e-10	1.58489e-38	8.93368e-31	1.27139e-29	-3.58362e-32	-1e-32	1.35614e-29
9.46	3.46737e-10	1.44544e-38	8.33739e-31	1.21417e-29	-3.50204e-32	-1e-32	1.29304e-29
9.47	3.38844e-10	1.31826e-38	7.78091e-31	1.15952e-29	-3.42233e-32	-1e-32	1.23291e-29
9.48	3.31131e-10	1.20226e-38	7.26156e-31	1.10733e-29	-3.34442e-32	-1e-32	1.1756e-29
9.49	3.23594e-10	1.09648e-38	6.77689e-31	1.0575e-29	-3.2683e-32	-1e-32	1.121e-29
9.5	3.16228e-10	1e-38	6.32456e-31	1.0099e-29	-3.1939e-32	-1e-32	1.06895e-29
9.51	3.0903e-10	9.12011e-39	5.90242e-31	9.64447e-30	-3.1212e-32	-1e-32	1.01935e-29
9.52	3.01995e-10	8.31764e-39	5.50846e-31	9.2104e-30	-3.05015e-32	-1e-32	9.72074e-30
9.53	2.95121e-10	7.58578e-39	5.14079e-31	8.79586e-30	-2.98072e-32	-1e-32	9.27013e-30
9.54	2.88403e-10	6.91831e-39	4.79767e-31	8.39998e-30	-2.91287e-32	-1e-32	8.84062e-30
9.55	2.81838e-10	6.30957e-39	4.47744e-31	8.02192e-30	-2.84657e-32	-1e-32	8.4312e-30
9.56	2.75423e-10	5.7544e-39	4.17859e-31	7.66088e-30	-2.78177e-32	-1e-32	8.04092e-30
9.57	2.69153e-10	5.24807e-39	3.89969e-31	7.31608e-30	-2.71845e-32	-1e-32	7.66886e-30
9.58	2.63027e-10	4.7863e-39	3.6394e-31	6.9868e-30	-2.65657e-32	-1e-32	7.31418e-30
9.59	2.5704e-10	4.36516e-39	3.39649e-31	6.67234e-30	-2.5961e-32	-1e-32	6.97603e-30
9.6	2.51189e-10	3.98107e-39	3.16979e-31	6.37204e-30	-2.53701e-32	-1e-32	6.65365e-30
9.61	2.45471e-10	3.63078e-39	2.95822e-31	6.08525e-30	-2.47926e-32	-1e-32	6.34628e-30
9.62	2.39883e-10	3.31131e-39	2.76077e-31	5.81137e-30	-2.42282e-32	-1e-32	6.05322e-30
9.63	2.34423e-10	3.01995e-39	2.5765e-31	5.54981e-30	-2.36767e-32	-1e-32	5.77379e-30
9.64	2.29087e-10	2.75423e-39	2.40453e-31	5.30003e-30	-2.31378e-32	-1e-32	5.50735e-30
9.65	2.23872e-10	2.51189e-39	2.24404e-31	5.06149e-30	-2.26111e-32	-1e-32	5.25328e-30
9.66	2.18776e-10	2.29087e-39	2.09426e-31	4.83369e-30	-2.20964e-32	-1e-32	5.01101e-30
9.67	2.13796e-10	2.0893e-39	1.95448e-31	4.61613e-30	-2.15934e-32	-1e-32	4.77999e-30
9.68	2.0893e-10	1.90546e-39	1.82402e-31	4.40837e-30	-2.11019e-32	-1e-32	4.55967e-30
9.69	2.04174e-10	1.7378e-39	1.70228e-31	4.20996e-30	-2.06216e-32	-1e-32	4.34957e-30
9.7	1.99526e-10	1.58489e-39	1.58866e-31	4.02048e-30	-2.01521e-32	-1e-32	4.1492e-30
9.71	1.94984e-10	1.44544e-39	1.48262e-31	3.83953e-30	-1.96934e-32	-1e-32	3.9581e-30
9.72	1.90546e-10	1.31826e-39	1.38366e-31	3.66673e-30	-1.92452e-32	-1e-32	3.77585e-30
9.73	1.86209e-10	1.20226e-39	1.29131e-31	3.5017e-30	-1.88071e-32	-1e-32	3.60202e-30
9.74	1.8197e-10	1.09648e-39	1.20512e-31	3.34409e-30	-1.8379e-32	-1e-32	3.43623e-30
9.75	1.77828e-10	1e-39	1.12468e-31	3.19358e-30	-1.79606e-32	-1e-32	3.27809e-30
9.76	1.7378e-10	9.12011e-40	1.04962e-31	3.04985e-30	-1.75518e-32	-1e-32	3.12726e-30
9.77	1.69824e-10	8.31764e-40	9.79558e-32	2.91258e-30	-1.71523e-32	-1e-32	2.98339e-30
9.78	1.65959e-10	7.58578e-40	9.14177e-32	2.7815e-30	-1.67618e-32	-1e-32	2.84615e-30
9.79	1.62181e-10	6.91831e-40	8.53159e-32	2.65631e-30	-1.63803e-32	-1e-32	2.71524e-30
9.8	1.58489e-10	6.30957e-40	7.96215e-32	2.53675e-30	-1.60074e-32	-1e-32	2.59037e-30
9.81	1.54882e-10	5.7544e-40	7.43071e-32	2.42258e-30	-1.5643e-32	-1e-32	2.47125e-30
9.82	1.51356e-10	5.24807e-40	6.93474e-32	2.31355e-30	-1.5287e-32	-1e-32	2.35761e-30
9.83	1.47911e-10	4.7863e-40	6.47188e-32	2.20942e-30	-1.4939e-32	-1e-32	2.2492e-30
9.84	1.44544e-10	4.36516e-40	6.03991e-32	2.10998e-30	-1.45989e-32	-1e-32	2.14578e-30
9.85	1.41254e-10	3.98107e-40	5.63677e-32	2.01502e-30	-1.42666e-32	-1e-32	2.04712e-30
9.86	1.38038e-10	3.63078e-40	5.26054e-32	1.92432e-30	-1.39419e-32	-1e-32	1.95299e-30
9.87	1.34896e-10	3.31131e-40	4.90942e-32	1.83772e-30	-1.36245e-32	-1e-32	1.86319e-30
9.88	1.31826e-10	3.01995e-40	4.58174e-32	1.75501e-30	-1.33144e-32	-1e-32	1.77751e-30
9.89	1.28825e-10	2.75423e-40	4.27593e-32	1.67602e-30	-1.30113e-32	-1e-32	1.69576e-30
9.9	1.25893e-10	2.51189e-40	3.99053e-32	1.60058e-30	-1.27151e-32	-1e-32	1.61777e-30
9.91	1.23027e-10	2.29087e-40	3.72418e-32	1.52855e-30	-1.24257e-32	-1e-32	1.54336e-30
9.92	1.20226e-10	2.0893e-40	3.4756e-32	1.45975e-30	-1.21429e-32	-1e-32	1.47236e-30
9.93	1.1749e-10	1.90546e-40	3.24362e-32	1.39405e-30	-1.18665e-32	-1e-32	1.40462e-30
9.94	1.14815e-10	1.7378e-40	3.02712e-32	1.33131e-30	-1.15964e-32	-1e-32	1.33998e-30
9.95	1.12202e-10	1.58489e-40	2.82508e-32	1.27139e-30	-1.13324e-32	-1e-32	1.27831e-30
9.96	1.09648e-10	1.44544e-40	2.63651e-32	1.21417e-30	-1.10744e-32	-1e-32	1.21946e-30
9.97	1.07152e-10	1.31826e-40	2.46054e-32	1.15952e-30	-1.08223e-32	-1e-32	1.1633e-30
9.98	1.04713e-10	1.20226e-40	2.29631e-32	1.10733e-30	-1.0576e-32	-1e-32	1.10972e-30
9.99	1.02329e-10	1.09648e-40	2.14304e-32	1.0575e-30	-1.03353e-32	-1e-32	1.05859e-30
10	1e-10	1e-40	2e-32	1.0099e-30	-1.01e-32	-1e-32	1.0098e-30
10.01	9.77237e-11	9.12011e-41	1.86651e-32	9.64447e-31	-9.8701e-33	-1e-32	9.63242e-31
10.02	9.54993e-11	8.31764e-41	1.74193e-32	9.2104e-31	-9.64543e-33	-1e-32	9.18814e-31
10.03	9.33254e-11	7.58578e-41	1.62566e-32	8.79586e-31	-9.42587e-33	-1e-32	8.76417e-31
10.04	9.12011e-11	6.91831e-41	1.51716e-32	8.39998e-31	-9.21131e-33	-1e-32	8.35958e-31
10.05	8.91251e-11	6.30957e-41	1.41589e-32	8.02192e-31	-9.00163e-33	-1e-32	7.97349e-31
10.06	8.70964e-11	5.7544e-41	1.32139e-32	7.66088e-31	-8.79673e-33	-1e-32	7.60505e-31
10.07	8.51138e-11	5.24807e-41	1.23319e-32	7.31608e-31	-8.59649e-33	-1e-32	7.25343e-31
10.08	8.31764e-11	4.7863e-41	1.15088e-32	6.9868e-31	-8.40081e-33	-1e-32	6.91788e-31
10.09	8.12831e-11	4.36516e-41	1.07406e-32	6.67234e-31	-8.20959e-33	-1e-32	6.59765e-31
10.1	7.94328e-11	3.98107e-41	1.00237e-32	6.37204e-31	-8.02272e-33	-1e-32	6.29205e-31
10.11	7.76247e-11	3.63078e-41	9.35471e-33	6.08525e-31	-7.8401e-33	-1e-32	6.0004e-31
10.12	7.58578e-11	3.31131e-41	8.73032e-33	5.81137e-31	-7.66163e-33	-1e-32	5.72205e-31
10.13	7.4131e-11	3.01995e-41	8.14761e-33	5.54981e-31	-7.48723e-33	-1e-32	5.45642e-31
10.14	7.24436e-11	2.75423e-41	7.60379e-33	5.30003e-31	-7.3168e-33	-1e-32	5.2029e-31
10.15	7.07946e-11	2.51189e-41	7.09627e-33	5.06149e-31	-7.15025e-33	-1e-32	4.96095e-31
10.16	6.91831e-11	2.29087e-41	6.62263e-33	4.83369e-31	-6.98749e-33	-1e-32	4.73004e-31
10.17	6.76083e-11	2.0893e-41	6.18059e-33	4.61613e-31	-6.82844e-33	-1e-32	4.50966e-31
10.18	6.60693e-11	1.90546e-41	5.76807e-33	4.40837e-31	-6.673e-33	-1e-32	4.29932e-31
10.19	6.45654e-11	1.7378e-41	5.38307e-33	4.20996e-31	-6.52111e-33	-1e-32	4.09858e-31
10.2	6.30957e-11	1.58489e-41	5.02378e-33	4.02048e-31	-6.37267e-33	-1e-32	3.907e-31
10.21	6.16595e-11	1.44544e-41	4.68846e-33	3.83953e-31	-6.22761e-33	-1e-32	3.72414e-31
10.22	6.0256e-11	1.31826e-41	4.37553e-33	3.66673e-31	-6.08585e-33	-1e-32	3.54962e-31
10.23	5.88844e-11	1.20226e-41	4.08348e-33	3.5017e-31	-5.94732e-33	-1e-32	3.38306e-31
10.24	5.7544e-11	1.09648e-41	3.81092e-33	3.34409e-31	-5.81194e-33	-1e-32	3.22408e-31
10.25	5.62341e-11	1e-41	3.55656e-33	3.19358e-31	-5.67965e-33	-1e-32	3.07235e-31
10.26	5.49541e-11	9.12011e-42	3.31918e-33	3.04985e-31	-5.55036e-33	-1e-32	2.92754e-31
10.27	5.37032e-11	8.31764e-42	3.09763e-33	2.91258e-31	-5.42402e-33	-1e-32	2.78932e-31
10.28	5.24807e-11	7.58578e-42	2.89088e-33	2.7815e-31	-5.30056e-33	-1e-32	2.6574e-31
10.29	5.12861e-11	6.91831e-42	2.69793e-33	2.65631e-31	-5.1799e-33	-1e-32	2.53149e-31
10.3	5.01187e-11	6.30957e-42	2.51785e-33	2.53675e-31	-5.06199e-33	-1e-32	2.41131e-31
10.31	4.89779e-11	5.7544e-42	2.3498e-33	2.42258e-31	-4.94677e-33	-1e-32	2.29661e-31
10.32	4.7863e-11	5.24807e-42	2.19296e-33	2.31355e-31	-4.83416e-33	-1e-32	2.18714e-31
10.33	4.67735e-11	4.7863e-42	2.04659e-33	2.20942e-31	-4.72412e-33	-1e-32	2.08265e-31
10.34	4.57088e-11	4.36516e-42	1.90999e-33	2.10998e-31	-4.61659e-33	-1e-32	1.98291e-31
10.35	4.46684e-11	3.98107e-42	1.7825e-33	2.01502e-31	-4.5115e-33	-1e-32	1.88773e-31
10.36	4.36516e-11	3.63078e-42	1.66353e-33	1.92432e-31	-4.40881e-33	-1e-32	1.79687e-31
10.37	4.2658e-11	3.31131e-42	1.5525e-33	1.83772e-31	-4.30845e-33	-1e-32	1.71016e-31
10.38	4.16869e-11	3.01995e-42	1.44887e-33	1.75501e-31	-4.21038e-33	-1e-32	1.62739e-31
10.39	4.0738e-11	2.75423e-42	1.35217e-33	1.67602e-31	-4.11454e-33	-1e-32	1.54839e-31
10.4	3.98107e-11	2.51189e-42	1.26192e-33	1.60058e-31	-4.02088e-33	-1e-32	1.47299e-31
10.41	3.89045e-11	2.29087e-42	1.17769e-33	1.52855e-31	-3.92936e-33	-1e-32	1.40103e-31
10.42	3.80189e-11	2.0893e-42	1.09908e-33	1.45975e-31	-3.83991e-33	-1e-32	1.33234e-31
10.43	3.71535e-11	1.90546e-42	1.02572e-33	1.39405e-31	-3.75251e-33	-1e-32	1.26678e-31
10.44	3.63078e-11	1.7378e-42	9.57261e-34	1.33131e-31	-3.66709e-33	-1e-32	1.20421e-31
10.45	3.54813e-11	1.58489e-42	8.93368e-34	1.27139e-31	-3.58362e-33	-1e-32	1.14449e-31
10.46	3.46737e-11	1.44544e-42	8.33739e-34	1.21417e-31	-3.50204e-33	-1e-32	1.08748e-31
10.47	3.38844e-11	1.31826e-42	7.78091e-34	1.15952e-31	-3.42233e-33	-1e-32	1.03308e-31
10.48	3.31131e-11	1.20226e-42	7.26156e-34	1.10733e-31	-3.34442e-33	-1e-32	9.81151e-32
10.49	3.23594e-11	1.09648e-42	6.77689e-34	1.0575e-31	-3.2683e-33	-1e-32	9.31589e-32
10.5	3.16228e-11	1e-42	6.32456e-34	1.0099e-31	-3.1939e-33	-1e-32	8.84286e-32
10.51	3.0903e-11	9.12011e-43	5.90242e-34	9.64447e-32	-3.1212e-33	-1e-32	8.39137e-32
10.52	3.01995e-11	8.31764e-43	5.50846e-34	9.2104e-32	-3.05015e-33	-1e-32	7.96047e-32
10.53	2.95121e-11	7.58578e-43	5.14079e-34	8.79586e-32	-2.98072e-33	-1e-32	7.5492e-32
10.54	2.88403e-11	6.91831e-43	4.79767e-34	8.39998e-32	-2.91287e-33	-1e-32	7.15667e-32
10.55	2.81838e-11	6.30957e-43	4.47744e-34	8.02192e-32	-2.84657e-33	-1e-32	6.78204e-32
10.56	2.75423e-11	5.7544e-43	4.17859e-34	7.66088e-32	-2.78177e-33	-1e-32	6.42448e-32
10.57	2.69153e-11	5.24807e-43	3.89969e-34	7.31608e-32	-2.71845e-33	-1e-32	6.08323e-32
10.58	2.63027e-11	4.7863e-43	3.6394e-34	6.9868e-32	-2.65657e-33	-1e-32	5.75754e-32
10.59	2.5704e-11	4.36516e-43	3.39649e-34	6.67234e-32	-2.5961e-33	-1e-32	5.4467e-32
10.6	2.51189e-11	3.98107e-43	3.16979e-34	6.37204e-32	-2.53701e-33	-1e-32	5.15004e-32
10.61	2.45471e-11	3.63078e-43	2.95822e-34	6.08525e-32	-2.47926e-33	-1e-32	4.86691e-32
10.62	2.39883e-11	3.31131e-43	2.76077e-34	5.81137e-32	-2.42282e-33	-1e-32	4.59669e-32
10.63	2.34423e-11	3.01995e-43	2.5765e-34	5.54981e-32	-2.36767e-33	-1e-32	4.33881e-32
10.64	2.29087e-11	2.75423e-43	2.40453e-34	5.30003e-32	-2.31378e-33	-1e-32	4.0927e-32
10.65	2.23872e-11	2.51189e-43	2.24404e-34	5.06149e-32	-2.26111e-33	-1e-32	3.85782e-32
10.66	2.18776e-11	2.29087e-43	2.09426e-34	4.83369e-32	-2.20964e-33	-1e-32	3.63366e-32
10.67	2.13796e-11	2.0893e-43	1.95448e-34	4.61613e-32	-2.15934e-33	-1e-32	3.41974e-32
10.68	2.0893e-11	1.90546e-43	1.82402e-34	4.40837e-32	-2.11019e-33	-1e-32	3.21559e-32
10.69	2.04174e-11	1.7378e-43	1.70228e-34	4.20996e-32	-2.06216e-33	-1e-32	3.02077e-32
10.7	1.99526e-11	1.58489e-43	1.58866e-34	4.02048e-32	-2.01521e-33	-1e-32	2.83485e-32
10.71	1.94984e-11	1.44544e-43	1.48262e-34	3.83953e-32	-1.96934e-33	-1e-32	2.65742e-32
10.72	1.90546e-11	1.31826e-43	1.38366e-34	3.66673e-32	-1.92452e-33	-1e-32	2.48811e-32
10.73	1.86209e-11	1.20226e-43	1.29131e-34	3.5017e-32	-1.88071e-33	-1e-32	2.32654e-32
10.74	1.8197e-11	1.09648e-43	1.20512e-34	3.34409e-32	-1.8379e-33	-1e-32	2.17235e-32
10.75	1.77828e-11	1e-43	1.12468e-34	3.19358e-32	-1.79606e-33	-1e-32	2.02522e-32
10.76	1.7378e-11	9.12011e-44	1.04962e-34	3.04985e-32	-1.75518e-33	-1e-32	1.88483e-32
10.77	1.69824e-11	8.31764e-44	9.79558e-35	2.91258e-32	-1.71523e-33	-1e-32	1.75086e-32
10.78	1.65959e-11	7.58578e-44	9.14177e-35	2.7815e-32	-1.67618e-33	-1e-32	1.62302e-32
10.79	1.62181e-11	6.91831e-44	8.53159e-35	2.65631e-32	-1.63803e-33	-1e-32	1.50104e-32
10.8	1.58489e-11	6.30957e-44	7.96215e-35	2.53675e-32	-1.60074e-33	-1e-32	1.38464e-32
10.81	1.54882e-11	5.7544e-44	7.43071e-35	2.42258e-32	-1.5643e-33	-1e-32	1.27358e-32
10.82	1.51356e-11	5.24807e-44	6.93474e-35	2.31355e-32	-1.5287e-33	-1e-32	1.16761e-32
10.83	1.47911e-11	4.7863e-44	6.47188e-35	2.20942e-32	-1.4939e-33	-1e-32	1.0665e-32
10.84	1.44544e-11	4.36516e-44	6.03991e-35	2.10998e-32	-1.45989e-33	-1e-32	9.70031e-33
10.85	1.41254e-11	3.98107e-44	5.63677e-35	2.01502e-32	-1.42666e-33	-1e-32	8.77986e-33
10.86	1.38038e-11	3.63078e-44	5.26054e-35	1.92432e-32	-1.39419e-33	-1e-32	7.90167e-33
10.87	1.34896e-11	3.31131e-44	4.90942e-35	1.83772e-32	-1.36245e-33	-1e-32	7.0638e-33
10.88	1.31826e-11	3.01995e-44	4.58174e-35	1.75501e-32	-1.33144e-33	-1e-32	6.26443e-33
10.89	1.28825e-11	2.75423e-44	4.27593e-35	1.67602e-32	-1.30113e-33	-1e-32	5.5018e-33
10.9	1.25893e-11	2.51189e-44	3.99053e-35	1.60058e-32	-1.27151e-33	-1e-32	4.77423e-33
10.91	1.23027e-11	2.29087e-44	3.72418e-35	1.52855e-32	-1.24257e-33	-1e-32	4.08013e-33
10.92	1.20226e-11	2.0893e-44	3.4756e-35	1.45975e-32	-1.21429e-33	-1e-32	3.41797e-33
10.93	1.1749e-11	1.90546e-44	3.24362e-35	1.39405e-32	-1.18665e-33	-1e-32	2.78629e-33
10.94	1.14815e-11	1.7378e-44	3.02712e-35	1.33131e-32	-1.15964e-33	-1e-32	2.18371e-33
10.95	1.12202e-11	1.58489e-44	2.82508e-35	1.27139e-32	-1.13324e-33	-1e-32	1.6089e-33
10.96	1.09648e-11	1.44544e-44	2.63651e-35	1.21417e-32	-1.10744e-33	-1e-32	1.06059e-33
10.97	1.07152e-11	1.31826e-44	2.46054e-35	1.15952e-32	-1.08223e-33	-1e-32	5.37574e-34
10.98	1.04713e-11	1.20226e-44	2.29631e-35	1.10733e-32	-1.0576e-33	-1e-32	3.86967e-35
10.99	1.02329e-11	1.09648e-44	2.14304e-35	1.0575e-32	-1.03353e-33	-1e-32	-4.37144e-34
11	1e-11	1e-44	2e-35	1.0099e-32	-1.01e-33	-1e-32	-8.91e-34
11.01	9.77237e-12	9.12011e-45	1.86651e-35	9.64447e-33	-9.8701e-34	-1e-32	-1.32387e-33
11.02	9.54993e-12	8.31764e-45	1.74193e-35	9.2104e-33	-9.64543e-34	-1e-32	-1.73673e-33
11.03	9.33254e-12	7.58578e-45	1.62566e-35	8.79586e-33	-9.42587e-34	-1e-32	-2.13047e-33
11.04	9.12011e-12	6.91831e-45	1.51716e-35	8.39998e-33	-9.21131e-34	-1e-32	-2.50598e-33
11.05	8.91251e-12	6.30957e-45	1.41589e-35	8.02192e-33	-9.00163e-34	-1e-32	-2.86408e-33
11.06	8.70964e-12	5.7544e-45	1.32139e-35	7.66088e-33	-8.79673e-34	-1e-32	-3.20558e-33
11.07	8.51138e-12	5.24807e-45	1.23319e-35	7.31608e-33	-8.59649e-34	-1e-32	-3.53124e-33
11.08	8.31764e-12	4.7863e-45	1.15088e-35	6.9868e-33	-8.40081e-34	-1e-32	-3.84177e-33
11.09	8.12831e-12	4.36516e-45	1.07406e-35	6.67234e-33	-8.20959e-34	-1e-32	-4.13787e-33
11.1	7.94328e-12	3.98107e-45	1.00237e-35	6.37204e-33	-8.02272e-34	-1e-32	-4.42021e-33
11.11	7.76247e-12	3.63078e-45	9.35471e-36	6.08525e-33	-7.8401e-34	-1e-32	-4.68941e-33
11.12	7.58578e-12	3.31131e-45	8.73032e-36	5.81137e-33	-7.66163e-34	-1e-32	-4.94607e-33
11.13	7.4131e-12	3.01995e-45	8.14761e-36	5.54981e-33	-7.48723e-34	-1e-32	-5.19076e-33
11.14	7.24436e-12	2.75423e-45	7.60379e-36	5.30003e-33	-7.3168e-34	-1e-32	-5.42405e-33
11.15	7.07946e-12	2.51189e-45	7.09627e-36	5.06149e-33	-7.15025e-34	-1e-32	-5.64644e-33
11.16	6.91831e-12	2.29087e-45	6.62263e-36	4.83369e-33	-6.98749e-34	-1e-32	-5.85844e-33
11.17	6.76083e-12	2.0893e-45	6.18059e-36	4.61613e-33	-6.82844e-34	-1e-32	-6.06053e-33
11.18	6.60693e-12	1.90546e-45	5.76807e-36	4.40837e-33	-6.673e-34	-1e-32	-6.25316e-33
11.19	6.45654e-12	1.7378e-45	5.38307e-36	4.20996e-33	-6.52111e-34	-1e-32	-6.43676e-33
11.2	6.30957e-12	1.58489e-45	5.02378e-36	4.02048e-33	-6.37267e-34	-1e-32	-6.61176e-33
11.21	6.16595e-12	1.44544e-45	4.68846e-36	3.83953e-33	-6.22761e-34	-1e-32	-6.77854e-33
11.22	6.0256e-12	1.31826e-45	4.37553e-36	3.66673e-33	-6.08585e-34	-1e-32	-6.93748e-33
11.23	5.88844e-12	1.20226e-45	4.08348e-36	3.5017e-33	-5.94732e-34	-1e-32	-7.08895e-33
11.24	5.7544e-12	1.09648e-45	3.81092e-36	3.34409e-33	-5.81194e-34	-1e-32	-7.23329e-33
11.25	5.62341e-12	1e-45	3.55656e-36	3.19358e-33	-5.67965e-34	-1e-32	-7.37082e-33
11.26	5.49541e-12	9.12011e-46	3.31918e-36	3.04985e-33	-5.55036e-34	-1e-32	-7.50187e-33
11.27	5.37032e-12	8.31764e-46	3.09763e-36	2.91258e-33	-5.42402e-34	-1e-32	-7.62672e-33
11.28	5.24807e-12	7.58578e-46	2.89088e-36	2.7815e-33	-5.30056e-34	-1e-32	-7.74567e-33
11.29	5.12861e-12	6.91831e-46	2.69793e-36	2.65631e-33	-5.1799e-34	-1e-32	-7.85898e-33
11.3	5.01187e-12	6.30957e-46	2.51785e-36	2.53675e-33	-5.06199e-34	-1e-32	-7.96693e-33
11.31	4.89779e-12	5.7544e-46	2.3498e-36	2.42258e-33	-4.94677e-34	-1e-32	-8.06975e-33
11.32	4.7863e-12	5.24807e-46	2.19296e-36	2.31355e-33	-4.83416e-34	-1e-32	-8.16768e-33
11.33	4.67735e-12	4.7863e-46	2.04659e-36	2.20942e-33	-4.72412e-34	-1e-32	-8.26095e-33
11.34	4.57088e-12	4.36516e-46	1.90999e-36	2.10998e-33	-4.61659e-34	-1e-32	-8.34977e-33
11.35	4.46684e-12	3.98107e-46	1.7825e-36	2.01502e-33	-4.5115e-34	-1e-32	-8.43435e-33
11.36	4.36516e-12	3.63078e-46	1.66353e-36	1.92432e-33	-4.40881e-34	-1e-32	-8.51489e-33
11.37	4.2658e-12	3.31131e-46	1.5525e-36	1.83772e-33	-4.30845e-34	-1e-32	-8.59158e-33
11.38	4.16869e-12	3.01995e-46	1.44887e-36	1.75501e-33	-4.21038e-34	-1e-32	-8.66458e-33
11.39	4.0738e-12	2.75423e-46	1.35217e-36	1.67602e-33	-4.11454e-34	-1e-32	-8.73409e-33
11.4	3.98107e-12	2.51189e-46	1.26192e-36	1.60058e-33	-4.02088e-34	-1e-32	-8.80024e-33
11.41	3.89045e-12	2.29087e-46	1.17769e-36	1.52855e-33	-3.92936e-34	-1e-32	-8.86321e-33
11.42	3.80189e-12	2.0893e-46	1.09908e-36	1.45975e-33	-3.83991e-34	-1e-32	-8.92314e-33
11.43	3.71535e-12	1.90546e-46	1.02572e-36	1.39405e-33	-3.75251e-34	-1e-32	-8.98017e-33
11.44	3.63078e-12	1.7378e-46	9.57261e-37	1.33131e-33	-3.66709e-34	-1e-32	-9.03444e-33
11.45	3.54813e-12	1.58489e-46	8.93368e-37	1.27139e-33	-3.58362e-34	-1e-32	-9.08608e-33
11.46	3.46737e-12	1.44544e-46	8.33739e-37	1.21417e-33	-3.50204e-34	-1e-32	-9.1352e-33
11.47	3.38844e-12	1.31826e-46	7.78091e-37	1.15952e-33	-3.42233e-34	-1e-32	-9.18193e-33
11.48	3.31131e-12	1.20226e-46	7.26156e-37	1.10733e-33	-3.34442e-34	-1e-32	-9.22638e-33
11.49	3.23594e-12	1.09648e-46	6.77689e-37	1.0575e-33	-3.2683e-34	-1e-32	-9.26866e-33
11.5	3.16228e-12	1e-46	6.32456e-37	1.0099e-33	-3.1939e-34	-1e-32	-9.30886e-33
11.51	3.0903e-12	9.12011e-47	5.90242e-37	9.64447e-34	-3.1212e-34	-1e-32	-9.34708e-33
11.52	3.01995e-12	8.31764e-47	5.50846e-37	9.2104e-34	-3.05015e-34	-1e-32	-9.38342e-33
11.53	2.95121e-12	7.58578e-47	5.14079e-37	8.79586e-34	-2.98072e-34	-1e-32	-9.41797e-33
11.54	2.88403e-12	6.91831e-47	4.79767e-37	8.39998e-34	-2.91287e-34	-1e-32	-9.45081e-33
11.55	2.81838e-12	6.30957e-47	4.47744e-37	8.02192e-34	-2.84657e-34	-1e-32	-9.48202e-33
11.56	2.75423e-12	5.7544e-47	4.17859e-37	7.66088e-34	-2.78177e-34	-1e-32	-9.51167e-33
11.57	2.69153e-12	5.24807e-47	3.89969e-37	7.31608e-34	-2.71845e-34	-1e-32	-9.53985e-33
11.58	2.63027e-12	4.7863e-47	3.6394e-37	6.9868e-34	-2.65657e-34	-1e-32	-9.56661e-33
11.59	2.5704e-12	4.36516e-47	3.39649e-37	6.67234e-34	-2.5961e-34	-1e-32	-9.59204e-33
11.6	2.51189e-12	3.98107e-47	3.16979e-37	6.37204e-34	-2.53701e-34	-1e-32	-9.61618e-33
11.61	2.45471e-12	3.63078e-47	2.95822e-37	6.08525e-34	-2.47926e-34	-1e-32	-9.6391e-33
11.62	2.39883e-12	3.31131e-47	2.76077e-37	5.81137e-34	-2.42282e-34	-1e-32	-9.66087e-33
11.63	2.34423e-12	3.01995e-47	2.5765e-37	5.54981e-34	-2.36767e-34	-1e-32	-9.68153e-33
11.64	2.29087e-12	2.75423e-47	2.40453e-37	5.30003e-34	-2.31378e-34	-1e-32	-9.70113e-33
11.65	2.23872e-12	2.51189e-47	2.24404e-37	5.06149e-34	-2.26111e-34	-1e-32	-9.71974e-33
11.66	2.18776e-12	2.29087e-47	2.09426e-37	4.83369e-34	-2.20964e-34	-1e-32	-9.73739e-33
11.67	2.13796e-12	2.0893e-47	1.95448e-37	4.61613e-34	-2.15934e-34	-1e-32	-9.75413e-33
11.68	2.0893e-12	1.90546e-47	1.82402e-37	4.40837e-34	-2.11019e-34	-1e-32	-9.77e-33
11.69	2.04174e-12	1.7378e-47	1.70228e-37	4.20996e-34	-2.06216e-34	-1e-32	-9.78505e-33
11.7	1.99526e-12	1.58489e-47	1.58866e-37	4.02048e-34	-2.01521e-34	-1e-32	-9.79931e-33
11.71	1.94984e-12	1.44544e-47	1.48262e-37	3.83953e-34	-1.96934e-34	-1e-32	-9.81283e-33
11.72	1.90546e-12	1.31826e-47	1.38366e-37	3.66673e-34	-1.92452e-34	-1e-32	-9.82564e-33
11.73	1.86209e-12	1.20226e-47	1.29131e-37	3.5017e-34	-1.88071e-34	-1e-32	-9.83777e-33
11.74	1.8197e-12	1.09648e-47	1.20512e-37	3.34409e-34	-1.8379e-34	-1e-32	-9.84926e-33
11.75	1.77828e-12	1e-47	1.12468e-37	3.19358e-34	-1.79606e-34	-1e-32	-9.86014e-33
11.76	1.7378e-12	9.12011e-48	1.04962e-37	3.04985e-34	-1.75518e-34	-1e-32	-9.87043e-33
11.77	1.69824e-12	8.31764e-48	9.79558e-38	2.91258e-34	-1.71523e-34	-1e-32	-9.88017e-33
11.78	1.65959e-12	7.58578e-48	9.14177e-38	2.7815e-34	-1.67618e-34	-1e-32	-9.88938e-33
11.79	1.62181e-12	6.91831e-48	8.53159e-38	2.65631e-34	-1.63803e-34	-1e-32	-9.89809e-33
11.8	1.58489e-12	6.30957e-48	7.96215e-38	2.53675e-34	-1.60074e-34	-1e-32	-9.90632e-33
11.81	1.54882e-12	5.7544e-48	7.43071e-38	2.42258e-34	-1.5643e-34	-1e-32	-9.9141e-33
11.82	1.51356e-12	5.24807e-48	6.93474e-38	2.31355e-34	-1.5287e-34	-1e-32	-9.92145e-33
11.83	1.47911e-12	4.7863e-48	6.47188e-38	2.20942e-34	-1.4939e-34	-1e-32	-9.92838e-33
11.84	1.44544e-12	4.36516e-48	6.03991e-38	2.10998e-34	-1.45989e-34	-1e-32	-9.93493e-33
11.85	1.41254e-12	3.98107e-48	5.63677e-38	2.01502e-34	-1.42666e-34	-1e-32	-9.94111e-33
11.86	1.38038e-12	3.63078e-48	5.26054e-38	1.92432e-34	-1.39419e-34	-1e-32	-9.94693e-33
11.87	1.34896e-12	3.31131e-48	4.90942e-38	1.83772e-34	-1.36245e-34	-1e-32	-9.95242e-33
11.88	1.31826e-12	3.01995e-48	4.58174e-38	1.75501e-34	-1.33144e-34	-1e-32	-9.9576e-33
11.89	1.28825e-12	2.75423e-48	4.27593e-38	1.67602e-34	-1.30113e-34	-1e-32	-9.96247e-33
11.9	1.25893e-12	2.51189e-48	3.99053e-38	1.60058e-34	-1.27151e-34	-1e-32	-9.96705e-33
11.91	1.23027e-12	2.29087e-48	3.72418e-38	1.52855e-34	-1.24257e-34	-1e-32	-9.97137e-33
11.92	1.20226e-12	2.0893e-48	3.4756e-38	1.45975e-34	-1.21429e-34	-1e-32	-9.97542e-33
11.93	1.1749e-12	1.90546e-48	3.24362e-38	1.39405e-34	-1.18665e-34	-1e-32	-9.97923e-33
11.94	1.14815e-12	1.7378e-48	3.02712e-38	1.33131e-34	-1.15964e-34	-1e-32	-9.9828e-33
11.95	1.12202e-12	1.58489e-48	2.82508e-38	1.27139e-34	-1.13324e-34	-1e-32	-9.98616e-33
11.96	1.09648e-12	1.44544e-48	2.63651e-38	1.21417e-34	-1.10744e-34	-1e-32	-9.9893e-33
11.97	1.07152e-12	1.31826e-48	2.46054e-38	1.15952e-34	-1.08223e-34	-1e-32	-9.99225e-33
11.98	1.04713e-12	1.20226e-48	2.29631e-38	1.10733e-34	-1.0576e-34	-1e-32	-9.995e-33
11.99	1.02329e-12	1.09648e-48	2.14304e-38	1.0575e-34	-1.03353e-34	-1e-32	-9.99758e-33
12	1e-12	1e-48	2e-38	1.0099e-34	-1.01e-34	-1e-32	-9.99999e-33
12.01	9.77237e-13	9.12011e-49	1.86651e-38	9.64447e-35	-9.8701e-35	-1e-32	-1.00022e-32
12.02	9.54993e-13	8.31764e-49	1.74193e-38	9.2104e-35	-9.64543e-35	-1e-32	-1.00043e-32
12.03	9.33254e-13	7.58578e-49	1.62566e-38	8.79586e-35	-9.42587e-35	-1e-32	-1.00063e-32
12.04	9.12011e-13	6.91831e-49	1.51716e-38	8.39998e-35	-9.21131e-35	-1e-32	-1.00081e-32
12.05	8.91251e-13	6.30957e-49	1.41589e-38	8.02192e-35	-9.00163e-35	-1e-32	-1.00098e-32
12.06	8.70964e-13	5.7544e-49	1.32139e-38	7.66088e-35	-8.79673e-35	-1e-32	-1.00113e-32
12.07	8.51138e-13	5.24807e-49	1.23319e-38	7.31608e-35	-8.59649e-35	-1e-32	-1.00128e-32
12.08	8.31764e-13	4.7863e-49	1.15088e-38	6.9868e-35	-8.40081e-35	-1e-32	-1.00141e-32
12.09	8.12831e-13	4.36516e-49	1.07406e-38	6.67234e-35	-8.20959e-35	-1e-32	-1.00154e-32
12.1	7.94328e-13	3.98107e-49	1.00237e-38	6.37204e-35	-8.02272e-35	-1e-32	-1.00165e-32
12.11	7.76247e-13	3.63078e-49	9.35471e-39	6.08525e-35	-7.8401e-35	-1e-32	-1.00175e-32
12.12	7.58578e-13	3.31131e-49	8.73032e-39	5.81137e-35	-7.66163e-35	-1e-32	-1.00185e-32
12.13	7.4131e-13	3.01995e-49	8.14761e-39	5.54981e-35	-7.48723e-35	-1e-32	-1.00194e-32
12.14	7.24436e-13	2.75423e-49	7.60379e-39	5.30003e-35	-7.3168e-35	-1e-32	-1.00202e-32
12.15	7.07946e-13	2.51189e-49	7.09627e-39	5.06149e-35	-7.15025e-35	-1e-32	-1.00209e-32
12.16	6.91831e-13	2.29087e-49	6.62263e-39	4.83369e-35	-6.98749e-35	-1e-32	-1.00215e-32
12.17	6.76083e-13	2.0893e-49	6.18059e-39	4.61613e-35	-6.82844e-35	-1e-32	-1.00221e-32
12.18	6.60693e-13	1.90546e-49	5.76807e-39	4.40837e-35	-6.673e-35	-1e-32	-1.00226e-32
12.19	6.45654e-13	1.7378e-49	5.38307e-39	4.20996e-35	-6.52111e-35	-1e-32	-1.00231e-32
12.2	6.30957e-13	1.58489e-49	5.02378e-39	4.02048e-35	-6.37267e-35	-1e-32	-1.00235e-32
12.21	6.16595e-13	1.44544e-49	4.68846e-39	3.83953e-35	-6.22761e-35	-1e-32	-1.00239e-32
12.22	6.0256e-13	1.31826e-49	4.37553e-39	3.66673e-35	-6.08585e-35	-1e-32	-1.00242e-32
12.23	5.88844e-13	1.20226e-49	4.08348e-39	3.5017e-35	-5.94732e-35	-1e-32	-1.00245e-32
12.24	5.7544e-13	1.09648e-49	3.81092e-39	3.34409e-35	-5.81194e-35	-1e-32	-1.00247e-32
12.25	5.62341e-13	1e-49	3.55656e-39	3.19358e-35	-5.67965e-35	-1e-32	-1.00249e-32
12.26	5.49541e-13	9.12011e-50	3.31918e-39	3.04985e-35	-5.55036e-35	-1e-32	-1.0025e-32
12.27	5.37032e-13	8.31764e-50	3.09763e-39	2.91258e-35	-5.42402e-35	-1e-32	-1.00251e-32
12.28	5.24807e-13	7.58578e-50	2.89088e-39	2.7815e-35	-5.30056e-35	-1e-32	-1.00252e-32
12.29	5.12861e-13	6.91831e-50	2.69793e-39	2.65631e-35	-5.1799e-35	-1e-32	-1.00252e-32
12.3	5.01187e-13	6.30957e-50	2.51785e-39	2.53675e-35	-5.06199e-35	-1e-32	-1.00252e-32
12.31	4.89779e-13	5.7544e-50	2.3498e-39	2.42258e-35	-4.94677e-35	-1e-32	-1.00252e-32
12.32	4.7863e-13	5.24807e-50	2.19296e-39	2.31355e-35	-4.83416e-35	-1e-32	-1.00252e-32
12.33	4.67735e-13	4.7863e-50	2.04659e-39	2.20942e-35	-4.72412e-35	-1e-32	-1.00251e-32
12.34	4.57088e-13	4.36516e-50	1.90999e-39	2.10998e-35	-4.61659e-35	-1e-32	-1.00251e-32
12.35	4.46684e-13	3.98107e-50	1.7825e-39	2.01502e-35	-4.5115e-35	-1e-32	-1.0025e-32
12.36	4.36516e-13	3.63078e-50	1.66353e-39	1.92432e-35	-4.40881e-35	-1e-32	-1.00248e-32
12.37	4.2658e-13	3.31131e-50	1.5525e-39	1.83772e-35	-4.30845e-35	-1e-32	-1.00247e-32
12.38	4.16869e-13	3.01995e-50	1.44887e-39	1.75501e-35	-4.21038e-35	-1e-32	-1.00246e-32
12.39	4.0738e-13	2.75423e-50	1.35217e-39	1.67602e-35	-4.11454e-35	-1e-32	-1.00244e-32
12.4	3.98107e-13	2.51189e-50	1.26192e-39	1.60058e-35	-4.02088e-35	-1e-32	-1.00242e-32
12.41	3.89045e-13	2.29087e-50	1.17769e-39	1.52855e-35	-3.92936e-35	-1e-32	-1.0024e-32
12.42	3.80189e-13	2.0893e-50	1.09908e-39	1.45975e-35	-3.83991e-35	-1e-32	-1.00238e-32
12.43	3.71535e-13	1.90546e-50	1.02572e-39	1.39405e-35	-3.75251e-35	-1e-32	-1.00236e-32
12.44	3.63078e-13	1.7378e-50	9.57261e-40	1.33131e-35	-3.66709e-35	-1e-32	-1.00234e-32
12.45	3.54813e-13	1.58489e-50	8.93368e-40	1.27139e-35	-3.58362e-35	-1e-32	-1.00231e-32
12.46	3.46737e-13	1.44544e-50	8.33739e-40	1.21417e-35	-3.50204e-35	-1e-32	-1.00229e-32
12.47	3.38844e-13	1.31826e-50	7.78091e-40	1.15952e-35	-3.42233e-35	-1e-32	-1.00226e-32
12.48	3.31131e-13	1.20226e-50	7.26156e-40	1.10733e-35	-3.34442e-35	-1e-32	-1.00224e-32
12.49	3.23594e-13	1.09648e-50	6.77689e-40	1.0575e-35	-3.2683e-35	-1e-32	-1.00221e-32
12.5	3.16228e-13	1e-50	6.32456e-40	1.0099e-35	-3.1939e-35	-1e-32	-1.00218e-32
12.51	3.0903e-13	9.12011e-51	5.90242e-40	9.64447e-36	-3.1212e-35	-1e-32	-1.00216e-32
12.52	3.01995e-13	8.31764e-51	5.50846e-40	9.2104e-36	-3.05015e-35	-1e-32	-1.00213e-32
12.53	2.95121e-13	7.58578e-51	5.14079e-40	8.79586e-36	-2.98072e-35	-1e-32	-1.0021e-32
12.54	2.88403e-13	6.91831e-51	4.79767e-40	8.39998e-36	-2.91287e-35	-1e-32	-1.00207e-32
12.55	2.81838e-13	6.30957e-51	4.47744e-40	8.02192e-36	-2.84657e-35	-1e-32	-1.00204e-32
12.56	2.75423e-13	5.7544e-51	4.17859e-40	7.66088e-36	-2.78177e-35	-1e-32	-1.00202e-32
12.57	2.69153e-13	5.24807e-51	3.89969e-40	7.31608e-36	-2.71845e-35	-1e-32	-1.00199e-32
12.58	2.63027e-13	4.7863e-51	3.6394e-40	6.9868e-36	-2.65657e-35	-1e-32	-1.00196e-32
12.59	2.5704e-13	4.36516e-51	3.39649e-40	6.67234e-36	-2.5961e-35	-1e-32	-1.00193e-32
12.6	2.51189e-13	3.98107e-51	3.16979e-40	6.37204e-36	-2.53701e-35	-1e-32	-1.0019e-32
12.61	2.45471e-13	3.63078e-51	2.95822e-40	6.08525e-36	-2.47926e-35	-1e-32	-1.00187e-32
12.62	2.39883e-13	3.31131e-51	2.76077e-40	5.81137e-36	-2.42282e-35	-1e-32	-1.00184e-32
12.63	2.34423e-13	3.01995e-51	2.5765e-40	5.54981e-36	-2.36767e-35	-1e-32	-1.00181e-32
12.64	2.29087e-13	2.75423e-51	2.40453e-40	5.30003e-36	-2.31378e-35	-1e-32	-1.00178e-32
12.65	2.23872e-13	2.51189e-51	2.24404e-40	5.06149e-36	-2.26111e-35	-1e-32	-1.00175e-32
12.66	2.18776e-13	2.29087e-51	2.09426e-40	4.83369e-36	-2.20964e-35	-1e-32	-1.00173e-32
12.67	2.13796e-13	2.0893e-51	1.95448e-40	4.61613e-36	-2.15934e-35	-1e-32	-1.0017e-32
12.68	2.0893e-13	1.90546e-51	1.82402e-40	4.40837e-36	-2.11019e-35	-1e-32	-1.00167e-32
12.69	2.04174e-13	1.7378e-51	1.70228e-40	4.20996e-36	-2.06216e-35	-1e-32	-1.00164e-32
12.7	1.99526e-13	1.58489e-51	1.58866e-40	4.02048e-36	-2.01521e-35	-1e-32	-1.00161e-32
12.71	1.94984e-13	1.44544e-51	1.48262e-40	3.83953e-36	-1.96934e-35	-1e-32	-1.00159e-32
12.72	1.90546e-13	1.31826e-51	1.38366e-40	3.66673e-36	-1.92452e-35	-1e-32	-1.00156e-32
12.73	1.86209e-13	1.20226e-51	1.29131e-40	3.5017e-36	-1.88071e-35	-1e-32	-1.00153e-32
12.74	1.8197e-13	1.09648e-51	1.20512e-40	3.34409e-36	-1.8379e-35	-1e-32	-1.0015e-32
12.75	1.77828e-13	1e-51	1.12468e-40	3.19358e-36	-1.79606e-35	-1e-32	-1.00148e-32
12.76	1.7378e-13	9.12011e-52	1.04962e-40	3.04985e-36	-1.75518e-35	-1e-32	-1.00145e-32
12.77	1.69824e-13	8.31764e-52	9.79558e-41	2.91258e-36	-1.71523e-35	-1e-32	-1.00142e-32
12.78	1.65959e-13	7.58578e-52	9.14177e-41	2.7815e-36	-1.67618e-35	-1e-32	-1.0014e-32
12.79	1.62181e-13	6.91831e-52	8.53159e-41	2.65631e-36	-1.63803e-35	-1e-32	-1.00137e-32
12.8	1.58489e-13	6.30957e-52	7.96215e-41	2.53675e-36	-1.60074e-35	-1e-32	-1.00135e-32
12.81	1.54882e-13	5.7544e-52	7.43071e-41	2.42258e-36	-1.5643e-35	-1e-32	-1.00132e-32
12.82	1.51356e-13	5.24807e-52	6.93474e-41	2.31355e-36	-1.5287e-35	-1e-32	-1.0013e-32
12.83	1.47911e-13	4.7863e-52	6.47188e-41	2.20942e-36	-1.4939e-35	-1e-32	-1.00127e-32
12.84	1.44544e-13	4.36516e-52	6.03991e-41	2.10998e-36	-1.45989e-35	-1e-32	-1.00125e-32
12.85	1.41254e-13	3.98107e-52	5.63677e-41	2.01502e-36	-1.42666e-35	-1e-32	-1.00123e-32
12.86	1.38038e-13	3.63078e-52	5.26054e-41	1.92432e-36	-1.39419e-35	-1e-32	-1.0012e-32
12.87	1.34896e-13	3.31131e-52	4.90942e-41	1.83772e-36	-1.36245e-35	-1e-32	-1.00118e-32
12.88	1.31826e-13	3.01995e-52	4.58174e-41	1.75501e-36	-1.33144e-35	-1e-32	-1.00116e-32
12.89	1.28825e-13	2.75423e-52	4.27593e-41	1.67602e-36	-1.30113e-35	-1e-32	-1.00113e-32
12.9	1.25893e-13	2.51189e-52	3.99053e-41	1.60058e-36	-1.27151e-35	-1e-32	-1.00111e-32
12.91	1.23027e-13	2.29087e-52	3.72418e-41	1.52855e-36	-1.24257e-35	-1e-32	-1.00109e-32
12.92	1.20226e-13	2.0893e-52	3.4756e-41	1.45975e-36	-1.21429e-35	-1e-32	-1.00107e-32
12.93	1.1749e-13	1.90546e-52	3.24362e-41	1.39405e-36	-1.18665e-35	-1e-32	-1.00105e-32
12.94	1.14815e-13	1.7378e-52	3.02712e-41	1.33131e-36	-1.15964e-35	-1e-32	-1.00103e-32
12.95	1.12202e-13	1.58489e-52	2.82508e-41	1.27139e-36	-1.13324e-35	-1e-32	-1.00101e-32
12.96	1.09648e-13	1.44544e-52	2.63651e-41	1.21417e-36	-1.10744e-35	-1e-32	-1.00099e-32
12.97	1.07152e-13	1.31826e-52	2.46054e-41	1.15952e-36	-1.08223e-35	-1e-32	-1.00097e-32
12.98	1.04713e-13	1.20226e-52	2.29631e-41	1.10733e-36	-1.0576e-35	-1e-32	-1.00095e-32
12.99	1.02329e-13	1.09648e-52	2.14304e-41	1.0575e-36	-1.03353e-35	-1e-32	-1.00093e-32
13	1e-13	1e-52	2e-41	1.0099e-36	-1.01e-35	-1e-32	-1.00091e-32
13.01	9.77237e-14	9.12011e-53	1.86651e-41	9.64447e-37	-9.8701e-36	-1e-32	-1.00089e-32
13.02	9.54993e-14	8.31764e-53	1.74193e-41	9.2104e-37	-9.64543e-36	-1e-32	-1.00087e-32
13.03	9.33254e-14	7.58578e-53	1.62566e-41	8.79586e-37	-9.42587e-36	-1e-32	-1.00085e-32
13.04	9.12011e-14	6.91831e-53	1.51716e-41	8.39998e-37	-9.21131e-36	-1e-32	-1.00084e-32
13.05	8.91251e-14	6.30957e-53	1.41589e-41	8.02192e-37	-9.00163e-36	-1e-32	-1.00082e-32
13.06	8.70964e-14	5.7544e-53	1.32139e-41	7.66088e-37	-8.79673e-36	-1e-32	-1.0008e-32
13.07	8.51138e-14	5.24807e-53	1.23319e-41	7.31608e-37	-8.59649e-36	-1e-32	-1.00079e-32
13.08	8.31764e-14	4.7863e-53	1.15088e-41	6.9868e-37	-8.40081e-36	-1e-32	-1.00077e-32
13.09	8.12831e-14	4.36516e-53	1.07406e-41	6.67234e-37	-8.20959e-36	-1e-32	-1.00075e-32
13.1	7.94328e-14	3.98107e-53	1.00237e-41	6.37204e-37	-8.02272e-36	-1e-32	-1.00074e-32
13.11	7.76247e-14	3.63078e-53	9.35471e-42	6.08525e-37	-7.8401e-36	-1e-32	-1.00072e-32
13.12	7.58578e-14	3.31131e-53	8.73032e-42	5.81137e-37	-7.66163e-36	-1e-32	-1.00071e-32
13.13	7.4131e-14	3.01995e-53	8.14761e-42	5.54981e-37	-7.48723e-36	-1e-32	-1.00069e-32
13.14	7.24436e-14	2.75423e-53	7.60379e-42	5.30003e-37	-7.3168e-36	-1e-32	-1.00068e-32
13.15	7.07946e-14	2.51189e-53	7.09627e-42	5.06149e-37	-7.15025e-36	-1e-32	-1.00066e-32
13.16	6.91831e-14	2.29087e-53	6.62263e-42	4.83369e-37	-6.98749e-36	-1e-32	-1.00065e-32
13.17	6.76083e-14	2.0893e-53	6.18059e-42	4.61613e-37	-6.82844e-36	-1e-32	-1.00064e-32
13.18	6.60693e-14	1.90546e-53	5.76807e-42	4.40837e-37	-6.673e-36	-1e-32	-1.00062e-32
13.19	6.45654e-14	1.7378e-53	5.38307e-42	4.20996e-37	-6.52111e-36	-1e-32	-1.00061e-32
13.2	6.30957e-14	1.58489e-53	5.02378e-42	4.02048e-37	-6.37267e-36	-1e-32	-1.0006e-32
13.21	6.16595e-14	1.44544e-53	4.68846e-42	3.83953e-37	-6.22761e-36	-1e-32	-1.00058e-32
13.22	6.0256e-14	1.31826e-53	4.37553e-42	3.66673e-37	-6.08585e-36	-1e-32	-1.00057e-32
13.23	5.88844e-14	1.20226e-53	4.08348e-42	3.5017e-37	-5.94732e-36	-1e-32	-1.00056e-32
13.24	5.7544e-14	1.09648e-53	3.81092e-42	3.34409e-37	-5.81194e-36	-1e-32	-1.00055e-32
13.25	5.62341e-14	1e-53	3.55656e-42	3.19358e-37	-5.67965e-36	-1e-32	-1.00054e-32
13.26	5.49541e-14	9.12011e-54	3.31918e-42	3.04985e-37	-5.55036e-36	-1e-32	-1.00052e-32
13.27	5.37032e-14	8.31764e-54	3.09763e-42	2.91258e-37	-5.42402e-36	-1e-32	-1.00051e-32
13.28	5.24807e-14	7.58578e-54	2.89088e-42	2.7815e-37	-5.30056e-36	-1e-32	-1.0005e-32
13.29	5.12861e-14	6.91831e-54	2.69793e-42	2.65631e-37	-5.1799e-36	-1e-32	-1.00049e-32
13.3	5.01187e-14	6.30957e-54	2.51785e-42	2.53675e-37	-5.06199e-36	-1e-32	-1.00048e-32
13.31	4.89779e-14	5.7544e-54	2.3498e-42	2.42258e-37	-4.94677e-36	-1e-32	-1.00047e-32
13.32	4.7863e-14	5.24807e-54	2.19296e-42	2.31355e-37	-4.83416e-36	-1e-32	-1.00046e-32
13.33	4.67735e-14	4.7863e-54	2.04659e-42	2.20942e-37	-4.72412e-36	-1e-32	-1.00045e-32
13.34	4.57088e-14	4.36516e-54	1.90999e-42	2.10998e-37	-4.61659e-36	-1e-32	-1.00044e-32
13.35	4.46684e-14	3.98107e-54	1.7825e-42	2.01502e-37	-4.5115e-36	-1e-32	-1.00043e-32
13.36	4.36516e-14	3.63078e-54	1.66353e-42	1.92432e-37	-4.40881e-36	-1e-32	-1.00042e-32
13.37	4.2658e-14	3.31131e-54	1.5525e-42	1.83772e-37	-4.30845e-36	-1e-32	-1.00041e-32
13.38	4.16869e-14	3.01995e-54	1.44887e-42	1.75501e-37	-4.21038e-36	-1e-32	-1.0004e-32
13.39	4.0738e-14	2.75423e-54	1.35217e-42	1.67602e-37	-4.11454e-36	-1e-32	-1.00039e-32
13.4	3.98107e-14	2.51189e-54	1.26192e-42	1.60058e-37	-4.02088e-36	-1e-32	-1.00039e-32
13.41	3.89045e-14	2.29087e-54	1.17769e-42	1.52855e-37	-3.92936e-36	-1e-32	-1.00038e-32
13.42	3.80189e-14	2.0893e-54	1.09908e-42	1.45975e-37	-3.83991e-36	-1e-32	-1.00037e-32
13.43	3.71535e-14	1.90546e-54	1.02572e-42	1.39405e-37	-3.75251e-36	-1e-32	-1.00036e-32
13.44	3.63078e-14	1.7378e-54	9.57261e-43	1.33131e-37	-3.66709e-36	-1e-32	-1.00035e-32
13.45	3.54813e-14	1.58489e-54	8.93368e-43	1.27139e-37	-3.58362e-36	-1e-32	-1.00035e-32
13.46	3.46737e-14	1.44544e-54	8.33739e-43	1.21417e-37	-3.50204e-36	-1e-32	-1.00034e-32
13.47	3.38844e-14	1.31826e-54	7.78091e-43	1.15952e-37	-3.42233e-36	-1e-32	-1.00033e-32
13.48	3.31131e-14	1.20226e-54	7.26156e-43	1.10733e-37	-3.34442e-36	-1e-32	-1.00032e-32
13.49	3.23594e-14	1.09648e-54	6.77689e-43	1.0575e-37	-3.2683e-36	-1e-32	-1.00032e-32
13.5	3.16228e-14	1e-54	6.32456e-43	1.0099e-37	-3.1939e-36	-1e-32	-1.00031e-32
13.51	3.0903e-14	9.12011e-55	5.90242e-43	9.64447e-38	-3.1212e-36	-1e-32	-1.0003e-32
13.52	3.01995e-14	8.31764e-55	5.50846e-43	9.2104e-38	-3.05015e-36	-1e-32	-1.0003e-32
13.53	2.95121e-14	7.58578e-55	5.14079e-43	8.79586e-38	-2.98072e-36	-1e-32	-1.00029e-32
13.54	2.88403e-14	6.91831e-55	4.79767e-43	8.39998e-38	-2.91287e-36	-1e-32	-1.00028e-32
13.55	2.81838e-14	6.30957e-55	4.47744e-43	8.02192e-38	-2.84657e-36	-1e-32	-1.00028e-32
13.56	2.75423e-14	5.7544e-55	4.17859e-43	7.66088e-38	-2.78177e-36	-1e-32	-1.00027e-32
13.57	2.69153e-14	5.24807e-55	3.89969e-43	7.31608e-38	-2.71845e-36	-1e-32	-1.00026e-32
13.58	2.63027e-14	4.7863e-55	3.6394e-43	6.9868e-38	-2.65657e-36	-1e-32	-1.00026e-32
13.59	2.5704e-14	4.36516e-55	3.39649e-43	6.67234e-38	-2.5961e-36	-1e-32	-1.00025e-32
13.6	2.51189e-14	3.98107e-55	3.16979e-43	6.37204e-38	-2.53701e-36	-1e-32	-1.00025e-32
13.61	2.45471e-14	3.63078e-55	2.95822e-43	6.08525e-38	-2.47926e-36	-1e-32	-1.00024e-32
13.62	2.39883e-14	3.31131e-55	2.76077e-43	5.81137e-38	-2.42282e-36	-1e-32	-1.00024e-32
13.63	2.34423e-14	3.01995e-55	2.5765e-43	5.54981e-38	-2.36767e-36	-1e-32	-1.00023e-32
13.64	2.29087e-14	2.75423e-55	2.40453e-43	5.30003e-38	-2.31378e-36	-1e-32	-1.00023e-32
13.65	2.23872e-14	2.51189e-55	2.24404e-43	5.06149e-38	-2.26111e-36	-1e-32	-1.00022e-32
13.66	2.18776e-14	2.29087e-55	2.09426e-43	4.83369e-38	-2.20964e-36	-1e-32	-1.00022e-32
13.67	2.13796e-14	2.0893e-55	1.95448e-43	4.61613e-38	-2.15934e-36	-1e-32	-1.00021e-32
13.68	2.0893e-14	1.90546e-55	1.82402e-43	4.40837e-38	-2.11019e-36	-1e-32	-1.00021e-32
13.69	2.04174e-14	1.7378e-55	1.70228e-43	4.20996e-38	-2.06216e-36	-1e-32	-1.0002e-32
13.7	1.99526e-14	1.58489e-55	1.58866e-43	4.02048e-38	-2.01521e-36	-1e-32	-1.0002e-32
13.71	1.94984e-14	1.44544e-55	1.48262e-43	3.83953e-38	-1.96934e-36	-1e-32	-1.00019e-32
13.72	1.90546e-14	1.31826e-55	1.38366e-43	3.66673e-38	-1.92452e-36	-1e-32	-1.00019e-32
13.73	1.86209e-14	1.20226e-55	1.29131e-43	3.5017e-38	-1.88071e-36	-1e-32	-1.00018e-32
13.74	1.8197e-14	1.09648e-55	1.20512e-43	3.34409e-38	-1.8379e-36	-1e-32	-1.00018e-32
13.75	1.77828e-14	1e-55	1.12468e-43	3.19358e-38	-1.79606e-36	-1e-32	-1.00018e-32
13.76	1.7378e-14	9.12011e-56	1.04962e-43	3.04985e-38	-1.75518e-36	-1e-32	-1.00017e-32
13.77	1.69824e-14	8.31764e-56	9.79558e-44	2.91258e-38	-1.71523e-36	-1e-32	-1.00017e-32
13.78	1.65959e-14	7.58578e-56	9.14177e-44	2.7815e-38	-1.67618e-36	-1e-32	-1.00016e-32
13.79	1.62181e-14	6.91831e-56	8.53159e-44	2.65631e-38	-1.63803e-36	-1e-32	-1.00016e-32
13.8	1.58489e-14	6.30957e-56	7.96215e-44	2.53675e-38	-1.60074e-36	-1e-32	-1.00016e-32
13.81	1.54882e-14	5.7544e-56	7.43071e-44	2.42258e-38	-1.5643e-36	-1e-32	-1.00015e-32
13.82	1.51356e-14	5.24807e-56	6.93474e-44	2.31355e-38	-1.5287e-36	-1e-32	-1.00015e-32
13.83	1.47911e-14	4.7863e-56	6.47188e-44	2.20942e-38	-1.4939e-36	-1e-32	-1.00015e-32
13.84	1.44544e-14	4.36516e-56	6.03991e-44	2.10998e-38	-1.45989e-36	-1e-32	-1.00014e-32
13.85	1.41254e-14	3.98107e-56	5.63677e-44	2.01502e-38	-1.42666e-36	-1e-32	-1.00014e-32
13.86	1.38038e-14	3.63078e-56	5.26054e-44	1.92432e-38	-1.39419e-36	-1e-32	-1.00014e-32
13.87	1.34896e-14	3.31131e-56	4.90942e-44	1.83772e-38	-1.36245e-36	-1e-32	-1.00013e-32
13.88	1.31826e-14	3.01995e-56	4.58174e-44	1.75501e-38	-1.33144e-36	-1e-32	-1.00013e-32
13.89	1.28825e-14	2.75423e-56	4.27593e-44	1.67602e-38	-1.30113e-36	-1e-32	-1.00013e-32
13.9	1.25893e-14	2.51189e-56	3.99053e-44	1.60058e-38	-1.27151e-36	-1e-32	-1.00013e-32
13.91	1.23027e-14	2.29087e-56	3.72418e-44	1.52855e-38	-1.24257e-36	-1e-32	-1.00012e-32
13.92	1.20226e-14	2.0893e-56	3.4756e-44	1.45975e-38	-1.21429e-36	-1e-32	-1.00012e-32
13.93	1.1749e-14	1.90546e-56	3.24362e-44	1.39405e-38	-1.18665e-36	-1e-32	-1.00012e-32
13.94	1.14815e-14	1.7378e-56	3.02712e-44	1.33131e-38	-1.15964e-36	-1e-32	-1.00011e-32
13.95	1.12202e-14	1.58489e-56	2.82508e-44	1.27139e-38	-1.13324e-36	-1e-32	-1.00011e-32
13.96	1.09648e-14	1.44544e-56	2.63651e-44	1.21417e-38	-1.10744e-36	-1e-32	-1.00011e-32
13.97	1.07152e-14	1.31826e-56	2.46054e-44	1.15952e-38	-1.08223e-36	-1e-32	-1.00011e-32
13.98	1.04713e-14	1.20226e-56	2.29631e-44	1.10733e-38	-1.0576e-36	-1e-32	-1.0001e-32
13.99	1.02329e-14	1.09648e-56	2.14304e-44	1.0575e-38	-1.03353e-36	-1e-32	-1.0001e-32
14	1e-14	1e-56	2e-44	1.0099e-38	-1.01e-36	-1e-32	-1.0001e-32
14.01	9.77237e-15	9.12011e-57	1.86651e-44	9.64447e-39	-9.8701e-37	-1e-32	-1.0001e-32
14.02	9.54993e-15	8.31764e-57	1.74193e-44	9.2104e-39	-9.64543e-37	-1e-32	-1.0001e-32
14.03	9.33254e-15	7.58578e-57	1.62566e-44	8.79586e-39	-9.42587e-37	-1e-32	-1.00009e-32
14.04	9.12011e-15	6.91831e-57	1.51716e-44	8.39998e-39	-9.21131e-37	-1e-32	-1.00009e-32
14.05	8.91251e-15	6.30957e-57	1.41589e-44	8.02192e-39	-9.00163e-37	-1e-32	-1.00009e-32
14.06	8.70964e-15	5.7544e-57	1.32139e-44	7.66088e-39	-8.79673e-37	-1e-32	-1.00009e-32
14.07	8.51138e-15	5.24807e-57	1.23319e-44	7.31608e-39	-8.59649e-37	-1e-32	-1.00009e-32
14.08	8.31764e-15	4.7863e-57	1.15088e-44	6.9868e-39	-8.40081e-37	-1e-32	-1.00008e-32
14.09	8.12831e-15	4.36516e-57	1.07406e-44	6.67234e-39	-8.20959e-37	-1e-32	-1.00008e-32
14.1	7.94328e-15	3.98107e-57	1.00237e-44	6.37204e-39	-8.02272e-37	-1e-32	-1.00008e-32
14.11	7.76247e-15	3.63078e-57	9.35471e-45	6.08525e-39	-7.8401e-37	-1e-32	-1.00008e-32
14.12	7.58578e-15	3.31131e-57	8.73032e-45	5.81137e-39	-7.66163e-37	-1e-32	-1.00008e-32
14.13	7.4131e-15	3.01995e-57	8.14761e-45	5.54981e-39	-7.48723e-37	-1e-32	-1.00007e-32
14.14	7.24436e-15	2.75423e-57	7.60379e-45	5.30003e-39	-7.3168e-37	-1e-32	-1.00007e-32
14.15	7.07946e-15	2.51189e-57	7.09627e-45	5.06149e-39	-7.15025e-37	-1e-32	-1.00007e-32
14.16	6.91831e-15	2.29087e-57	6.62263e-45	4.83369e-39	-6.98749e-37	-1e-32	-1.00007e-32
14.17	6.76083e-15	2.0893e-57	6.18059e-45	4.61613e-39	-6.82844e-37	-1e-32	-1.00007e-32
14.18	6.60693e-15	1.90546e-57	5.76807e-45	4.40837e-39	-6.673e-37	-1e-32	-1.00007e-32
14.19	6.45654e-15	1.7378e-57	5.38307e-45	4.20996e-39	-6.52111e-37	-1e-32	-1.00006e-32
14.2	6.30957e-15	1.58489e-57	5.02378e-45	4.02048e-39	-6.37267e-37	-1e-32	-1.00006e-32
14.21	6.16595e-15	1.44544e-57	4.68846e-45	3.83953e-39	-6.22761e-37	-1e-32	-1.00006e-32
14.22	6.0256e-15	1.31826e-57	4.37553e-45	3.66673e-39	-6.08585e-37	-1e-32	-1.00006e-32
14.23	5.88844e-15	1.20226e-57	4.08348e-45	3.5017e-39	-5.94732e-37	-1e-32	-1.00006e-32
14.24	5.7544e-15	1.09648e-57	3.81092e-45	3.34409e-39	-5.81194e-37	-1e-32	-1.00006e-32
14.25	5.62341e-15	1e-57	3.55656e-45	3.19358e-39	-5.67965e-37	-1e-32	-1.00006e-32
14.26	5.49541e-15	9.12011e-58	3.31918e-45	3.04985e-39	-5.55036e-37	-1e-32	-1.00006e-32
14.27	5.37032e-15	8.31764e-58	3.09763e-45	2.91258e-39	-5.42402e-37	-1e-32	-1.00005e-32
14.28	5.24807e-15	7.58578e-58	2.89088e-45	2.7815e-39	-5.30056e-37	-1e-32	-1.00005e-32
14.29	5.12861e-15	6.91831e-58	2.69793e-45	2.65631e-39	-5.1799e-37	-1e-32	-1.00005e-32
14.3	5.01187e-15	6.30957e-58	2.51785e-45	2.53675e-39	-5.06199e-37	-1e-32	-1.00005e-32
14.31	4.89779e-15	5.7544e-58	2.3498e-45	2.42258e-39	-4.94677e-37	-1e-32	-1.00005e-32
14.32	4.7863e-15	5.24807e-58	2.19296e-45	2.31355e-39	-4.83416e-37	-1e-32	-1.00005e-32
14.33	4.67735e-15	4.7863e-58	2.04659e-45	2.20942e-39	-4.72412e-37	-1e-32	-1.00005e-32
14.34	4.57088e-15	4.36516e-58	1.90999e-45	2.10998e-39	-4.61659e-37	-1e-32	-1.00005e-32
14.35	4.46684e-15	3.98107e-58	1.7825e-45	2.01502e-39	-4.5115e-37	-1e-32	-1.00004e-32
14.36	4.36516e-15	3.63078e-58	1.66353e-45	1.92432e-39	-4.40881e-37	-1e-32	-1.00004e-32
14.37	4.2658e-15	3.31131e-58	1.5525e-45	1.83772e-39	-4.30845e-37	-1e-32	-1.00004e-32
14.38	4.16869e-15	3.01995e-58	1.44887e-45	1.75501e-39	-4.21038e-37	-1e-32	-1.00004e-32
14.39	4.0738e-15	2.75423e-58	1.35217e-45	1.67602e-39	-4.11454e-37	-1e-32	-1.00004e-32
14.4	3.98107e-15	2.51189e-58	1.26192e-45	1.60058e-39	-4.02088e-37	-1e-32	-1.00004e-32
14.41	3.89045e-15	2.29087e-58	1.17769e-45	1.52855e-39	-3.92936e-37	-1e-32	-1.00004e-32
14.42	3.80189e-15	2.0893e-58	1.09908e-45	1.45975e-39	-3.83991e-37	-1e-32	-1.00004e-32
14.43	3.71535e-15	1.90546e-58	1.02572e-45	1.39405e-39	-3.75251e-37	-1e-32	-1.00004e-32
14.44	3.63078e-15	1.7378e-58	9.57261e-46	1.33131e-39	-3.66709e-37	-1e-32	-1.00004e-32
14.45	3.54813e-15	1.58489e-58	8.93368e-46	1.27139e-39	-3.58362e-37	-1e-32	-1.00004e-32
14.46	3.46737e-15	1.44544e-58	8.33739e-46	1.21417e-39	-3.50204e-37	-1e-32	-1.00003e-32
14.47	3.38844e-15	1.31826e-58	7.78091e-46	1.15952e-39	-3.42233e-37	-1e-32	-1.00003e-32
14.48	3.31131e-15	1.20226e-58	7.26156e-46	1.10733e-39	-3.34442e-37	-1e-32	-1.00003e-32
14.49	3.23594e-15	1.09648e-58	6.77689e-46	1.0575e-39	-3.2683e-37	-1e-32	-1.00003e-32
14.5	3.16228e-15	1e-58	6.32456e-46	1.0099e-39	-3.1939e-37	-1e-32	-1.00003e-32

## Sheet: under CO2 
TWO BASES IN WATER UNDER CO2
										Instructions
base X has a pKaH of				Calculator for % protonation					1	Enter pKaH of base X and Y into the respective cells (yellow cells)
base X has a KaH of	1	M							2	Enter the concentrations of bases X and Y (green cells)
[X]0 =		M		pH	[H3O+]	% prot of X	% prot of Y		3	In the W column (orange cell), search for the value closest to zero. Then look across to the pH column and record the pH corresponding to that number
					1	0.5	0.5		4	In the blue cell, type in the pH you recorded in step 3. After this is done the % protonation will appear for X and Y in their resepective columns
base Y has a pKaH of
base Y has a KaH of	1	M								Note
[Y]0 =		M								If a non negative number does not appear in the W column then set the first value in the pH to a lower value
Kw =	1e-14	M2
delta pH	0.01
P(CO2) =	1	bar
KH =	0.034	M/bar
K*a1 =	4.6e-07	M
K*a1KHP(CO2) =	1.564e-08	M2
pH	[H3O+]	1st term	2nd term	3rd term	4th term	5th term	W
5	1e-05	1e-20	2e-15	1e-10	-3.128e-13	-1.564e-08	-1.55403e-08
5.01	9.77237e-06	9.12011e-21	1.86651e-15	9.54993e-11	-3.0568e-13	-1.564e-08	-1.55448e-08
5.02	9.54993e-06	8.31764e-21	1.74193e-15	9.12011e-11	-2.98722e-13	-1.564e-08	-1.55491e-08
5.03	9.33254e-06	7.58578e-21	1.62566e-15	8.70964e-11	-2.91922e-13	-1.564e-08	-1.55532e-08
5.04	9.12011e-06	6.91831e-21	1.51716e-15	8.31764e-11	-2.85277e-13	-1.564e-08	-1.55571e-08
5.05	8.91251e-06	6.30957e-21	1.41589e-15	7.94328e-11	-2.78783e-13	-1.564e-08	-1.55609e-08
5.06	8.70964e-06	5.7544e-21	1.32139e-15	7.58578e-11	-2.72438e-13	-1.564e-08	-1.55644e-08
5.07	8.51138e-06	5.24807e-21	1.23319e-15	7.24436e-11	-2.66236e-13	-1.564e-08	-1.55678e-08
5.08	8.31764e-06	4.7863e-21	1.15088e-15	6.91831e-11	-2.60176e-13	-1.564e-08	-1.55711e-08
5.09	8.12831e-06	4.36516e-21	1.07406e-15	6.60693e-11	-2.54254e-13	-1.564e-08	-1.55742e-08
5.1	7.94328e-06	3.98107e-21	1.00237e-15	6.30957e-11	-2.48466e-13	-1.564e-08	-1.55772e-08
5.11	7.76247e-06	3.63078e-21	9.3547e-16	6.0256e-11	-2.4281e-13	-1.564e-08	-1.558e-08
5.12	7.58578e-06	3.31131e-21	8.73032e-16	5.7544e-11	-2.37283e-13	-1.564e-08	-1.55827e-08
5.13	7.4131e-06	3.01995e-21	8.14761e-16	5.49541e-11	-2.31882e-13	-1.564e-08	-1.55853e-08
5.14	7.24436e-06	2.75423e-21	7.60379e-16	5.24807e-11	-2.26604e-13	-1.564e-08	-1.55878e-08
5.15	7.07946e-06	2.51189e-21	7.09627e-16	5.01187e-11	-2.21446e-13	-1.564e-08	-1.55901e-08
5.16	6.91831e-06	2.29087e-21	6.62262e-16	4.7863e-11	-2.16405e-13	-1.564e-08	-1.55924e-08
5.17	6.76083e-06	2.0893e-21	6.18059e-16	4.57088e-11	-2.11479e-13	-1.564e-08	-1.55945e-08
5.18	6.60693e-06	1.90546e-21	5.76806e-16	4.36516e-11	-2.06665e-13	-1.564e-08	-1.55966e-08
5.19	6.45654e-06	1.7378e-21	5.38307e-16	4.16869e-11	-2.01961e-13	-1.564e-08	-1.55985e-08
5.2	6.30957e-06	1.58489e-21	5.02377e-16	3.98107e-11	-1.97364e-13	-1.564e-08	-1.56004e-08
5.21	6.16595e-06	1.44544e-21	4.68846e-16	3.80189e-11	-1.92871e-13	-1.564e-08	-1.56022e-08
5.22	6.0256e-06	1.31826e-21	4.37552e-16	3.63078e-11	-1.88481e-13	-1.564e-08	-1.56039e-08
5.23	5.88844e-06	1.20226e-21	4.08348e-16	3.46737e-11	-1.8419e-13	-1.564e-08	-1.56055e-08
5.24	5.7544e-06	1.09648e-21	3.81092e-16	3.31131e-11	-1.79998e-13	-1.564e-08	-1.56071e-08
5.25	5.62341e-06	1e-21	3.55656e-16	3.16228e-11	-1.759e-13	-1.564e-08	-1.56086e-08
5.26	5.49541e-06	9.12011e-22	3.31917e-16	3.01995e-11	-1.71896e-13	-1.564e-08	-1.561e-08
5.27	5.37032e-06	8.31764e-22	3.09763e-16	2.88403e-11	-1.67984e-13	-1.564e-08	-1.56113e-08
5.28	5.24807e-06	7.58578e-22	2.89088e-16	2.75423e-11	-1.6416e-13	-1.564e-08	-1.56126e-08
5.29	5.12861e-06	6.91831e-22	2.69793e-16	2.63027e-11	-1.60423e-13	-1.564e-08	-1.56139e-08
5.3	5.01187e-06	6.30957e-22	2.51785e-16	2.51189e-11	-1.56771e-13	-1.564e-08	-1.5615e-08
5.31	4.89779e-06	5.7544e-22	2.3498e-16	2.39883e-11	-1.53203e-13	-1.564e-08	-1.56162e-08
5.32	4.7863e-06	5.24807e-22	2.19296e-16	2.29087e-11	-1.49716e-13	-1.564e-08	-1.56173e-08
5.33	4.67735e-06	4.7863e-22	2.04659e-16	2.18776e-11	-1.46308e-13	-1.564e-08	-1.56183e-08
5.34	4.57088e-06	4.36516e-22	1.90999e-16	2.0893e-11	-1.42977e-13	-1.564e-08	-1.56193e-08
5.35	4.46684e-06	3.98107e-22	1.7825e-16	1.99526e-11	-1.39723e-13	-1.564e-08	-1.56202e-08
5.36	4.36516e-06	3.63078e-22	1.66353e-16	1.90546e-11	-1.36542e-13	-1.564e-08	-1.56211e-08
5.37	4.2658e-06	3.31131e-22	1.55249e-16	1.8197e-11	-1.33434e-13	-1.564e-08	-1.56219e-08
5.38	4.16869e-06	3.01995e-22	1.44887e-16	1.7378e-11	-1.30397e-13	-1.564e-08	-1.56228e-08
5.39	4.0738e-06	2.75423e-22	1.35217e-16	1.65959e-11	-1.27429e-13	-1.564e-08	-1.56235e-08
5.4	3.98107e-06	2.51189e-22	1.26191e-16	1.58489e-11	-1.24528e-13	-1.564e-08	-1.56243e-08
5.41	3.89045e-06	2.29087e-22	1.17769e-16	1.51356e-11	-1.21693e-13	-1.564e-08	-1.5625e-08
5.42	3.80189e-06	2.0893e-22	1.09908e-16	1.44544e-11	-1.18923e-13	-1.564e-08	-1.56257e-08
5.43	3.71535e-06	1.90546e-22	1.02572e-16	1.38038e-11	-1.16216e-13	-1.564e-08	-1.56263e-08
5.44	3.63078e-06	1.7378e-22	9.5726e-17	1.31826e-11	-1.13571e-13	-1.564e-08	-1.56269e-08
5.45	3.54813e-06	1.58489e-22	8.93367e-17	1.25893e-11	-1.10986e-13	-1.564e-08	-1.56275e-08
5.46	3.46737e-06	1.44544e-22	8.33739e-17	1.20226e-11	-1.08459e-13	-1.564e-08	-1.56281e-08
5.47	3.38844e-06	1.31826e-22	7.7809e-17	1.14815e-11	-1.05991e-13	-1.564e-08	-1.56286e-08
5.48	3.31131e-06	1.20226e-22	7.26156e-17	1.09648e-11	-1.03578e-13	-1.564e-08	-1.56291e-08
5.49	3.23594e-06	1.09648e-22	6.77688e-17	1.04713e-11	-1.0122e-13	-1.564e-08	-1.56296e-08
5.5	3.16228e-06	1e-22	6.32456e-17	1e-11	-9.89161e-14	-1.564e-08	-1.56301e-08
5.51	3.0903e-06	9.12011e-23	5.90242e-17	9.54993e-12	-9.66645e-14	-1.564e-08	-1.56306e-08
5.52	3.01995e-06	8.31764e-23	5.50846e-17	9.12011e-12	-9.44642e-14	-1.564e-08	-1.5631e-08
5.53	2.95121e-06	7.58578e-23	5.14079e-17	8.70964e-12	-9.23139e-14	-1.564e-08	-1.56314e-08
5.54	2.88403e-06	6.91831e-23	4.79767e-17	8.31764e-12	-9.02126e-14	-1.564e-08	-1.56318e-08
5.55	2.81838e-06	6.30957e-23	4.47744e-17	7.94328e-12	-8.81591e-14	-1.564e-08	-1.56322e-08
5.56	2.75423e-06	5.7544e-23	4.17859e-17	7.58578e-12	-8.61523e-14	-1.564e-08	-1.56325e-08
5.57	2.69153e-06	5.24807e-23	3.89969e-17	7.24436e-12	-8.41913e-14	-1.564e-08	-1.56328e-08
5.58	2.63027e-06	4.7863e-23	3.6394e-17	6.91831e-12	-8.22748e-14	-1.564e-08	-1.56332e-08
5.59	2.5704e-06	4.36516e-23	3.39649e-17	6.60693e-12	-8.0402e-14	-1.564e-08	-1.56335e-08
5.6	2.51189e-06	3.98107e-23	3.16979e-17	6.30957e-12	-7.85719e-14	-1.564e-08	-1.56338e-08
5.61	2.45471e-06	3.63078e-23	2.95822e-17	6.0256e-12	-7.67833e-14	-1.564e-08	-1.56341e-08
5.62	2.39883e-06	3.31131e-23	2.76077e-17	5.7544e-12	-7.50355e-14	-1.564e-08	-1.56343e-08
5.63	2.34423e-06	3.01995e-23	2.5765e-17	5.49541e-12	-7.33275e-14	-1.564e-08	-1.56346e-08
5.64	2.29087e-06	2.75423e-23	2.40453e-17	5.24807e-12	-7.16584e-14	-1.564e-08	-1.56348e-08
5.65	2.23872e-06	2.51189e-23	2.24404e-17	5.01187e-12	-7.00272e-14	-1.564e-08	-1.56351e-08
5.66	2.18776e-06	2.29087e-23	2.09426e-17	4.7863e-12	-6.84332e-14	-1.564e-08	-1.56353e-08
5.67	2.13796e-06	2.0893e-23	1.95447e-17	4.57088e-12	-6.68755e-14	-1.564e-08	-1.56355e-08
5.68	2.0893e-06	1.90546e-23	1.82402e-17	4.36516e-12	-6.53532e-14	-1.564e-08	-1.56357e-08
5.69	2.04174e-06	1.7378e-23	1.70228e-17	4.16869e-12	-6.38656e-14	-1.564e-08	-1.56359e-08
5.7	1.99526e-06	1.58489e-23	1.58866e-17	3.98107e-12	-6.24118e-14	-1.564e-08	-1.56361e-08
5.71	1.94984e-06	1.44544e-23	1.48262e-17	3.80189e-12	-6.09912e-14	-1.564e-08	-1.56363e-08
5.72	1.90546e-06	1.31826e-23	1.38366e-17	3.63078e-12	-5.96028e-14	-1.564e-08	-1.56364e-08
5.73	1.86209e-06	1.20226e-23	1.29131e-17	3.46737e-12	-5.82461e-14	-1.564e-08	-1.56366e-08
5.74	1.8197e-06	1.09648e-23	1.20512e-17	3.31131e-12	-5.69203e-14	-1.564e-08	-1.56368e-08
5.75	1.77828e-06	1e-23	1.12468e-17	3.16228e-12	-5.56246e-14	-1.564e-08	-1.56369e-08
5.76	1.7378e-06	9.12011e-24	1.04961e-17	3.01995e-12	-5.43584e-14	-1.564e-08	-1.5637e-08
5.77	1.69824e-06	8.31764e-24	9.79558e-18	2.88403e-12	-5.31211e-14	-1.564e-08	-1.56372e-08
5.78	1.65959e-06	7.58578e-24	9.14176e-18	2.75423e-12	-5.19119e-14	-1.564e-08	-1.56373e-08
5.79	1.62181e-06	6.91831e-24	8.53159e-18	2.63027e-12	-5.07303e-14	-1.564e-08	-1.56374e-08
5.8	1.58489e-06	6.30957e-24	7.96214e-18	2.51189e-12	-4.95755e-14	-1.564e-08	-1.56375e-08
5.81	1.54882e-06	5.7544e-24	7.4307e-18	2.39883e-12	-4.8447e-14	-1.564e-08	-1.56377e-08
5.82	1.51356e-06	5.24807e-24	6.93474e-18	2.29087e-12	-4.73442e-14	-1.564e-08	-1.56378e-08
5.83	1.47911e-06	4.7863e-24	6.47187e-18	2.18776e-12	-4.62665e-14	-1.564e-08	-1.56379e-08
5.84	1.44544e-06	4.36516e-24	6.0399e-18	2.0893e-12	-4.52134e-14	-1.564e-08	-1.5638e-08
5.85	1.41254e-06	3.98107e-24	5.63677e-18	1.99526e-12	-4.41842e-14	-1.564e-08	-1.56381e-08
5.86	1.38038e-06	3.63078e-24	5.26054e-18	1.90546e-12	-4.31784e-14	-1.564e-08	-1.56381e-08
5.87	1.34896e-06	3.31131e-24	4.90942e-18	1.8197e-12	-4.21956e-14	-1.564e-08	-1.56382e-08
5.88	1.31826e-06	3.01995e-24	4.58174e-18	1.7378e-12	-4.12351e-14	-1.564e-08	-1.56383e-08
5.89	1.28825e-06	2.75423e-24	4.27592e-18	1.65959e-12	-4.02965e-14	-1.564e-08	-1.56384e-08
5.9	1.25893e-06	2.51189e-24	3.99052e-18	1.58489e-12	-3.93792e-14	-1.564e-08	-1.56385e-08
5.91	1.23027e-06	2.29087e-24	3.72417e-18	1.51356e-12	-3.84828e-14	-1.564e-08	-1.56385e-08
5.92	1.20226e-06	2.0893e-24	3.4756e-18	1.44544e-12	-3.76069e-14	-1.564e-08	-1.56386e-08
5.93	1.1749e-06	1.90546e-24	3.24362e-18	1.38038e-12	-3.67508e-14	-1.564e-08	-1.56387e-08
5.94	1.14815e-06	1.7378e-24	3.02712e-18	1.31826e-12	-3.59143e-14	-1.564e-08	-1.56387e-08
5.95	1.12202e-06	1.58489e-24	2.82508e-18	1.25893e-12	-3.50968e-14	-1.564e-08	-1.56388e-08
5.96	1.09648e-06	1.44544e-24	2.63651e-18	1.20226e-12	-3.42979e-14	-1.564e-08	-1.56388e-08
5.97	1.07152e-06	1.31826e-24	2.46054e-18	1.14815e-12	-3.35171e-14	-1.564e-08	-1.56389e-08
5.98	1.04713e-06	1.20226e-24	2.29631e-18	1.09648e-12	-3.27542e-14	-1.564e-08	-1.56389e-08
5.99	1.02329e-06	1.09648e-24	2.14304e-18	1.04713e-12	-3.20086e-14	-1.564e-08	-1.5639e-08
6	1e-06	1e-24	2e-18	1e-12	-3.128e-14	-1.564e-08	-1.5639e-08
6.01	9.77237e-07	9.12011e-25	1.86651e-18	9.54993e-13	-3.0568e-14	-1.564e-08	-1.56391e-08
6.02	9.54993e-07	8.31764e-25	1.74193e-18	9.12011e-13	-2.98722e-14	-1.564e-08	-1.56391e-08
6.03	9.33254e-07	7.58578e-25	1.62566e-18	8.70964e-13	-2.91922e-14	-1.564e-08	-1.56392e-08
6.04	9.12011e-07	6.91831e-25	1.51716e-18	8.31764e-13	-2.85277e-14	-1.564e-08	-1.56392e-08
6.05	8.91251e-07	6.30957e-25	1.41589e-18	7.94328e-13	-2.78783e-14	-1.564e-08	-1.56392e-08
6.06	8.70964e-07	5.7544e-25	1.32139e-18	7.58578e-13	-2.72438e-14	-1.564e-08	-1.56393e-08
6.07	8.51138e-07	5.24807e-25	1.23319e-18	7.24436e-13	-2.66236e-14	-1.564e-08	-1.56393e-08
6.08	8.31764e-07	4.7863e-25	1.15088e-18	6.91831e-13	-2.60176e-14	-1.564e-08	-1.56393e-08
6.09	8.12831e-07	4.36516e-25	1.07406e-18	6.60693e-13	-2.54254e-14	-1.564e-08	-1.56394e-08
6.1	7.94328e-07	3.98107e-25	1.00237e-18	6.30957e-13	-2.48466e-14	-1.564e-08	-1.56394e-08
6.11	7.76247e-07	3.63078e-25	9.3547e-19	6.0256e-13	-2.4281e-14	-1.564e-08	-1.56394e-08
6.12	7.58578e-07	3.31131e-25	8.73032e-19	5.7544e-13	-2.37283e-14	-1.564e-08	-1.56395e-08
6.13	7.4131e-07	3.01995e-25	8.14761e-19	5.49541e-13	-2.31882e-14	-1.564e-08	-1.56395e-08
6.14	7.24436e-07	2.75423e-25	7.60379e-19	5.24807e-13	-2.26604e-14	-1.564e-08	-1.56395e-08
6.15	7.07946e-07	2.51189e-25	7.09627e-19	5.01187e-13	-2.21446e-14	-1.564e-08	-1.56395e-08
6.16	6.91831e-07	2.29087e-25	6.62262e-19	4.7863e-13	-2.16405e-14	-1.564e-08	-1.56396e-08
6.17	6.76083e-07	2.0893e-25	6.18059e-19	4.57088e-13	-2.11479e-14	-1.564e-08	-1.56396e-08
6.18	6.60693e-07	1.90546e-25	5.76806e-19	4.36516e-13	-2.06665e-14	-1.564e-08	-1.56396e-08
6.19	6.45654e-07	1.7378e-25	5.38307e-19	4.16869e-13	-2.01961e-14	-1.564e-08	-1.56396e-08
6.2	6.30957e-07	1.58489e-25	5.02377e-19	3.98107e-13	-1.97364e-14	-1.564e-08	-1.56396e-08
6.21	6.16595e-07	1.44544e-25	4.68846e-19	3.80189e-13	-1.92871e-14	-1.564e-08	-1.56396e-08
6.22	6.0256e-07	1.31826e-25	4.37552e-19	3.63078e-13	-1.88481e-14	-1.564e-08	-1.56397e-08
6.23	5.88844e-07	1.20226e-25	4.08348e-19	3.46737e-13	-1.8419e-14	-1.564e-08	-1.56397e-08
6.24	5.7544e-07	1.09648e-25	3.81092e-19	3.31131e-13	-1.79998e-14	-1.564e-08	-1.56397e-08
6.25	5.62341e-07	1e-25	3.55656e-19	3.16228e-13	-1.759e-14	-1.564e-08	-1.56397e-08
6.26	5.49541e-07	9.12011e-26	3.31917e-19	3.01995e-13	-1.71896e-14	-1.564e-08	-1.56397e-08
6.27	5.37032e-07	8.31764e-26	3.09763e-19	2.88403e-13	-1.67984e-14	-1.564e-08	-1.56397e-08
6.28	5.24807e-07	7.58578e-26	2.89088e-19	2.75423e-13	-1.6416e-14	-1.564e-08	-1.56398e-08
6.29	5.12861e-07	6.91831e-26	2.69793e-19	2.63027e-13	-1.60423e-14	-1.564e-08	-1.56398e-08
6.3	5.01187e-07	6.30957e-26	2.51785e-19	2.51189e-13	-1.56771e-14	-1.564e-08	-1.56398e-08
6.31	4.89779e-07	5.7544e-26	2.3498e-19	2.39883e-13	-1.53203e-14	-1.564e-08	-1.56398e-08
6.32	4.7863e-07	5.24807e-26	2.19296e-19	2.29087e-13	-1.49716e-14	-1.564e-08	-1.56398e-08
6.33	4.67735e-07	4.7863e-26	2.04659e-19	2.18776e-13	-1.46308e-14	-1.564e-08	-1.56398e-08
6.34	4.57088e-07	4.36516e-26	1.90999e-19	2.0893e-13	-1.42977e-14	-1.564e-08	-1.56398e-08
6.35	4.46684e-07	3.98107e-26	1.7825e-19	1.99526e-13	-1.39723e-14	-1.564e-08	-1.56398e-08
6.36	4.36516e-07	3.63078e-26	1.66353e-19	1.90546e-13	-1.36542e-14	-1.564e-08	-1.56398e-08
6.37	4.2658e-07	3.31131e-26	1.55249e-19	1.8197e-13	-1.33434e-14	-1.564e-08	-1.56398e-08
6.38	4.16869e-07	3.01995e-26	1.44887e-19	1.7378e-13	-1.30397e-14	-1.564e-08	-1.56398e-08
6.39	4.0738e-07	2.75423e-26	1.35217e-19	1.65959e-13	-1.27429e-14	-1.564e-08	-1.56399e-08
6.4	3.98107e-07	2.51189e-26	1.26191e-19	1.58489e-13	-1.24528e-14	-1.564e-08	-1.56399e-08
6.41	3.89045e-07	2.29087e-26	1.17769e-19	1.51356e-13	-1.21693e-14	-1.564e-08	-1.56399e-08
6.42	3.80189e-07	2.0893e-26	1.09908e-19	1.44544e-13	-1.18923e-14	-1.564e-08	-1.56399e-08
6.43	3.71535e-07	1.90546e-26	1.02572e-19	1.38038e-13	-1.16216e-14	-1.564e-08	-1.56399e-08
6.44	3.63078e-07	1.7378e-26	9.5726e-20	1.31826e-13	-1.13571e-14	-1.564e-08	-1.56399e-08
6.45	3.54813e-07	1.58489e-26	8.93367e-20	1.25893e-13	-1.10986e-14	-1.564e-08	-1.56399e-08
6.46	3.46737e-07	1.44544e-26	8.33739e-20	1.20226e-13	-1.08459e-14	-1.564e-08	-1.56399e-08
6.47	3.38844e-07	1.31826e-26	7.7809e-20	1.14815e-13	-1.05991e-14	-1.564e-08	-1.56399e-08
6.48	3.31131e-07	1.20226e-26	7.26156e-20	1.09648e-13	-1.03578e-14	-1.564e-08	-1.56399e-08
6.49	3.23594e-07	1.09648e-26	6.77688e-20	1.04713e-13	-1.0122e-14	-1.564e-08	-1.56399e-08
6.5	3.16228e-07	1e-26	6.32456e-20	1e-13	-9.89161e-15	-1.564e-08	-1.56399e-08
6.51	3.0903e-07	9.12011e-27	5.90242e-20	9.54993e-14	-9.66645e-15	-1.564e-08	-1.56399e-08
6.52	3.01995e-07	8.31764e-27	5.50846e-20	9.12011e-14	-9.44642e-15	-1.564e-08	-1.56399e-08
6.53	2.95121e-07	7.58578e-27	5.14079e-20	8.70964e-14	-9.23139e-15	-1.564e-08	-1.56399e-08
6.54	2.88403e-07	6.91831e-27	4.79767e-20	8.31764e-14	-9.02126e-15	-1.564e-08	-1.56399e-08
6.55	2.81838e-07	6.30957e-27	4.47744e-20	7.94328e-14	-8.81591e-15	-1.564e-08	-1.56399e-08
6.56	2.75423e-07	5.7544e-27	4.17859e-20	7.58578e-14	-8.61523e-15	-1.564e-08	-1.56399e-08
6.57	2.69153e-07	5.24807e-27	3.89969e-20	7.24436e-14	-8.41913e-15	-1.564e-08	-1.56399e-08
6.58	2.63027e-07	4.7863e-27	3.6394e-20	6.91831e-14	-8.22748e-15	-1.564e-08	-1.56399e-08
6.59	2.5704e-07	4.36516e-27	3.39649e-20	6.60693e-14	-8.0402e-15	-1.564e-08	-1.564e-08
6.6	2.51189e-07	3.98107e-27	3.16979e-20	6.30957e-14	-7.85719e-15	-1.564e-08	-1.564e-08
6.61	2.45471e-07	3.63078e-27	2.95822e-20	6.0256e-14	-7.67833e-15	-1.564e-08	-1.564e-08
6.62	2.39883e-07	3.31131e-27	2.76077e-20	5.7544e-14	-7.50355e-15	-1.564e-08	-1.564e-08
6.63	2.34423e-07	3.01995e-27	2.5765e-20	5.49541e-14	-7.33275e-15	-1.564e-08	-1.564e-08
6.64	2.29087e-07	2.75423e-27	2.40453e-20	5.24807e-14	-7.16584e-15	-1.564e-08	-1.564e-08
6.65	2.23872e-07	2.51189e-27	2.24404e-20	5.01187e-14	-7.00272e-15	-1.564e-08	-1.564e-08
6.66	2.18776e-07	2.29087e-27	2.09426e-20	4.7863e-14	-6.84332e-15	-1.564e-08	-1.564e-08
6.67	2.13796e-07	2.0893e-27	1.95447e-20	4.57088e-14	-6.68755e-15	-1.564e-08	-1.564e-08
6.68	2.0893e-07	1.90546e-27	1.82402e-20	4.36516e-14	-6.53532e-15	-1.564e-08	-1.564e-08
6.69	2.04174e-07	1.7378e-27	1.70228e-20	4.16869e-14	-6.38656e-15	-1.564e-08	-1.564e-08
6.7	1.99526e-07	1.58489e-27	1.58866e-20	3.98107e-14	-6.24118e-15	-1.564e-08	-1.564e-08
6.71	1.94984e-07	1.44544e-27	1.48262e-20	3.80189e-14	-6.09912e-15	-1.564e-08	-1.564e-08
6.72	1.90546e-07	1.31826e-27	1.38366e-20	3.63078e-14	-5.96028e-15	-1.564e-08	-1.564e-08
6.73	1.86209e-07	1.20226e-27	1.29131e-20	3.46737e-14	-5.82461e-15	-1.564e-08	-1.564e-08
6.74	1.8197e-07	1.09648e-27	1.20512e-20	3.31131e-14	-5.69203e-15	-1.564e-08	-1.564e-08
6.75	1.77828e-07	1e-27	1.12468e-20	3.16228e-14	-5.56246e-15	-1.564e-08	-1.564e-08
6.76	1.7378e-07	9.12011e-28	1.04961e-20	3.01995e-14	-5.43584e-15	-1.564e-08	-1.564e-08
6.77	1.69824e-07	8.31764e-28	9.79558e-21	2.88403e-14	-5.31211e-15	-1.564e-08	-1.564e-08
6.78	1.65959e-07	7.58578e-28	9.14176e-21	2.75423e-14	-5.19119e-15	-1.564e-08	-1.564e-08
6.79	1.62181e-07	6.91831e-28	8.53159e-21	2.63027e-14	-5.07303e-15	-1.564e-08	-1.564e-08
6.8	1.58489e-07	6.30957e-28	7.96214e-21	2.51189e-14	-4.95755e-15	-1.564e-08	-1.564e-08
6.81	1.54882e-07	5.7544e-28	7.4307e-21	2.39883e-14	-4.8447e-15	-1.564e-08	-1.564e-08
6.82	1.51356e-07	5.24807e-28	6.93474e-21	2.29087e-14	-4.73442e-15	-1.564e-08	-1.564e-08
6.83	1.47911e-07	4.7863e-28	6.47187e-21	2.18776e-14	-4.62665e-15	-1.564e-08	-1.564e-08
6.84	1.44544e-07	4.36516e-28	6.0399e-21	2.0893e-14	-4.52134e-15	-1.564e-08	-1.564e-08
6.85	1.41254e-07	3.98107e-28	5.63677e-21	1.99526e-14	-4.41842e-15	-1.564e-08	-1.564e-08
6.86	1.38038e-07	3.63078e-28	5.26054e-21	1.90546e-14	-4.31784e-15	-1.564e-08	-1.564e-08
6.87	1.34896e-07	3.31131e-28	4.90942e-21	1.8197e-14	-4.21956e-15	-1.564e-08	-1.564e-08
6.88	1.31826e-07	3.01995e-28	4.58174e-21	1.7378e-14	-4.12351e-15	-1.564e-08	-1.564e-08
6.89	1.28825e-07	2.75423e-28	4.27592e-21	1.65959e-14	-4.02965e-15	-1.564e-08	-1.564e-08
6.9	1.25893e-07	2.51189e-28	3.99052e-21	1.58489e-14	-3.93792e-15	-1.564e-08	-1.564e-08
6.91	1.23027e-07	2.29087e-28	3.72417e-21	1.51356e-14	-3.84828e-15	-1.564e-08	-1.564e-08
6.92	1.20226e-07	2.0893e-28	3.4756e-21	1.44544e-14	-3.76069e-15	-1.564e-08	-1.564e-08
6.93	1.1749e-07	1.90546e-28	3.24362e-21	1.38038e-14	-3.67508e-15	-1.564e-08	-1.564e-08
6.94	1.14815e-07	1.7378e-28	3.02712e-21	1.31826e-14	-3.59143e-15	-1.564e-08	-1.564e-08
6.95	1.12202e-07	1.58489e-28	2.82508e-21	1.25893e-14	-3.50968e-15	-1.564e-08	-1.564e-08
6.96	1.09648e-07	1.44544e-28	2.63651e-21	1.20226e-14	-3.42979e-15	-1.564e-08	-1.564e-08
6.97	1.07152e-07	1.31826e-28	2.46054e-21	1.14815e-14	-3.35171e-15	-1.564e-08	-1.564e-08
6.98	1.04713e-07	1.20226e-28	2.29631e-21	1.09648e-14	-3.27542e-15	-1.564e-08	-1.564e-08
6.99	1.02329e-07	1.09648e-28	2.14304e-21	1.04713e-14	-3.20086e-15	-1.564e-08	-1.564e-08
7	1e-07	1e-28	2e-21	1e-14	-3.128e-15	-1.564e-08	-1.564e-08
7.01	9.77237e-08	9.12011e-29	1.86651e-21	9.54993e-15	-3.0568e-15	-1.564e-08	-1.564e-08
7.02	9.54993e-08	8.31764e-29	1.74193e-21	9.12011e-15	-2.98722e-15	-1.564e-08	-1.564e-08
7.03	9.33254e-08	7.58578e-29	1.62566e-21	8.70964e-15	-2.91922e-15	-1.564e-08	-1.564e-08
7.04	9.12011e-08	6.91831e-29	1.51716e-21	8.31764e-15	-2.85277e-15	-1.564e-08	-1.564e-08
7.05	8.91251e-08	6.30957e-29	1.41589e-21	7.94328e-15	-2.78783e-15	-1.564e-08	-1.564e-08
7.06	8.70964e-08	5.7544e-29	1.32139e-21	7.58578e-15	-2.72438e-15	-1.564e-08	-1.564e-08
7.07	8.51138e-08	5.24807e-29	1.23319e-21	7.24436e-15	-2.66236e-15	-1.564e-08	-1.564e-08
7.08	8.31764e-08	4.7863e-29	1.15088e-21	6.91831e-15	-2.60176e-15	-1.564e-08	-1.564e-08
7.09	8.12831e-08	4.36516e-29	1.07406e-21	6.60693e-15	-2.54254e-15	-1.564e-08	-1.564e-08
7.1	7.94328e-08	3.98107e-29	1.00237e-21	6.30957e-15	-2.48466e-15	-1.564e-08	-1.564e-08
7.11	7.76247e-08	3.63078e-29	9.3547e-22	6.0256e-15	-2.4281e-15	-1.564e-08	-1.564e-08
7.12	7.58578e-08	3.31131e-29	8.73032e-22	5.7544e-15	-2.37283e-15	-1.564e-08	-1.564e-08
7.13	7.4131e-08	3.01995e-29	8.14761e-22	5.49541e-15	-2.31882e-15	-1.564e-08	-1.564e-08
7.14	7.24436e-08	2.75423e-29	7.60379e-22	5.24807e-15	-2.26604e-15	-1.564e-08	-1.564e-08
7.15	7.07946e-08	2.51189e-29	7.09627e-22	5.01187e-15	-2.21446e-15	-1.564e-08	-1.564e-08
7.16	6.91831e-08	2.29087e-29	6.62262e-22	4.7863e-15	-2.16405e-15	-1.564e-08	-1.564e-08
7.17	6.76083e-08	2.0893e-29	6.18059e-22	4.57088e-15	-2.11479e-15	-1.564e-08	-1.564e-08
7.18	6.60693e-08	1.90546e-29	5.76806e-22	4.36516e-15	-2.06665e-15	-1.564e-08	-1.564e-08
7.19	6.45654e-08	1.7378e-29	5.38307e-22	4.16869e-15	-2.01961e-15	-1.564e-08	-1.564e-08
7.2	6.30957e-08	1.58489e-29	5.02377e-22	3.98107e-15	-1.97364e-15	-1.564e-08	-1.564e-08
7.21	6.16595e-08	1.44544e-29	4.68846e-22	3.80189e-15	-1.92871e-15	-1.564e-08	-1.564e-08
7.22	6.0256e-08	1.31826e-29	4.37552e-22	3.63078e-15	-1.88481e-15	-1.564e-08	-1.564e-08
7.23	5.88844e-08	1.20226e-29	4.08348e-22	3.46737e-15	-1.8419e-15	-1.564e-08	-1.564e-08
7.24	5.7544e-08	1.09648e-29	3.81092e-22	3.31131e-15	-1.79998e-15	-1.564e-08	-1.564e-08
7.25	5.62341e-08	1e-29	3.55656e-22	3.16228e-15	-1.759e-15	-1.564e-08	-1.564e-08
7.26	5.49541e-08	9.12011e-30	3.31917e-22	3.01995e-15	-1.71896e-15	-1.564e-08	-1.564e-08
7.27	5.37032e-08	8.31764e-30	3.09763e-22	2.88403e-15	-1.67984e-15	-1.564e-08	-1.564e-08
7.28	5.24807e-08	7.58578e-30	2.89088e-22	2.75423e-15	-1.6416e-15	-1.564e-08	-1.564e-08
7.29	5.12861e-08	6.91831e-30	2.69793e-22	2.63027e-15	-1.60423e-15	-1.564e-08	-1.564e-08
7.3	5.01187e-08	6.30957e-30	2.51785e-22	2.51189e-15	-1.56771e-15	-1.564e-08	-1.564e-08
7.31	4.89779e-08	5.7544e-30	2.3498e-22	2.39883e-15	-1.53203e-15	-1.564e-08	-1.564e-08
7.32	4.7863e-08	5.24807e-30	2.19296e-22	2.29087e-15	-1.49716e-15	-1.564e-08	-1.564e-08
7.33	4.67735e-08	4.7863e-30	2.04659e-22	2.18776e-15	-1.46308e-15	-1.564e-08	-1.564e-08
7.34	4.57088e-08	4.36516e-30	1.90999e-22	2.0893e-15	-1.42977e-15	-1.564e-08	-1.564e-08
7.35	4.46684e-08	3.98107e-30	1.7825e-22	1.99526e-15	-1.39723e-15	-1.564e-08	-1.564e-08
7.36	4.36516e-08	3.63078e-30	1.66353e-22	1.90546e-15	-1.36542e-15	-1.564e-08	-1.564e-08
7.37	4.2658e-08	3.31131e-30	1.55249e-22	1.8197e-15	-1.33434e-15	-1.564e-08	-1.564e-08
7.38	4.16869e-08	3.01995e-30	1.44887e-22	1.7378e-15	-1.30397e-15	-1.564e-08	-1.564e-08
7.39	4.0738e-08	2.75423e-30	1.35217e-22	1.65959e-15	-1.27429e-15	-1.564e-08	-1.564e-08
7.4	3.98107e-08	2.51189e-30	1.26191e-22	1.58489e-15	-1.24528e-15	-1.564e-08	-1.564e-08
7.41	3.89045e-08	2.29087e-30	1.17769e-22	1.51356e-15	-1.21693e-15	-1.564e-08	-1.564e-08
7.42	3.80189e-08	2.0893e-30	1.09908e-22	1.44544e-15	-1.18923e-15	-1.564e-08	-1.564e-08
7.43	3.71535e-08	1.90546e-30	1.02572e-22	1.38038e-15	-1.16216e-15	-1.564e-08	-1.564e-08
7.44	3.63078e-08	1.7378e-30	9.5726e-23	1.31826e-15	-1.13571e-15	-1.564e-08	-1.564e-08
7.45	3.54813e-08	1.58489e-30	8.93367e-23	1.25893e-15	-1.10986e-15	-1.564e-08	-1.564e-08
7.46	3.46737e-08	1.44544e-30	8.33739e-23	1.20226e-15	-1.08459e-15	-1.564e-08	-1.564e-08
7.47	3.38844e-08	1.31826e-30	7.7809e-23	1.14815e-15	-1.05991e-15	-1.564e-08	-1.564e-08
7.48	3.31131e-08	1.20226e-30	7.26156e-23	1.09648e-15	-1.03578e-15	-1.564e-08	-1.564e-08
7.49	3.23594e-08	1.09648e-30	6.77688e-23	1.04713e-15	-1.0122e-15	-1.564e-08	-1.564e-08
7.5	3.16228e-08	1e-30	6.32456e-23	1e-15	-9.89161e-16	-1.564e-08	-1.564e-08
7.51	3.0903e-08	9.12011e-31	5.90242e-23	9.54993e-16	-9.66645e-16	-1.564e-08	-1.564e-08
7.52	3.01995e-08	8.31764e-31	5.50846e-23	9.12011e-16	-9.44642e-16	-1.564e-08	-1.564e-08
7.53	2.95121e-08	7.58578e-31	5.14079e-23	8.70964e-16	-9.23139e-16	-1.564e-08	-1.564e-08
7.54	2.88403e-08	6.91831e-31	4.79767e-23	8.31764e-16	-9.02126e-16	-1.564e-08	-1.564e-08
7.55	2.81838e-08	6.30957e-31	4.47744e-23	7.94328e-16	-8.81591e-16	-1.564e-08	-1.564e-08
7.56	2.75423e-08	5.7544e-31	4.17859e-23	7.58578e-16	-8.61523e-16	-1.564e-08	-1.564e-08
7.57	2.69153e-08	5.24807e-31	3.89969e-23	7.24436e-16	-8.41913e-16	-1.564e-08	-1.564e-08
7.58	2.63027e-08	4.7863e-31	3.6394e-23	6.91831e-16	-8.22748e-16	-1.564e-08	-1.564e-08
7.59	2.5704e-08	4.36516e-31	3.39649e-23	6.60693e-16	-8.0402e-16	-1.564e-08	-1.564e-08
7.6	2.51189e-08	3.98107e-31	3.16979e-23	6.30957e-16	-7.85719e-16	-1.564e-08	-1.564e-08
7.61	2.45471e-08	3.63078e-31	2.95822e-23	6.0256e-16	-7.67833e-16	-1.564e-08	-1.564e-08
7.62	2.39883e-08	3.31131e-31	2.76077e-23	5.7544e-16	-7.50355e-16	-1.564e-08	-1.564e-08
7.63	2.34423e-08	3.01995e-31	2.5765e-23	5.49541e-16	-7.33275e-16	-1.564e-08	-1.564e-08
7.64	2.29087e-08	2.75423e-31	2.40453e-23	5.24807e-16	-7.16584e-16	-1.564e-08	-1.564e-08
7.65	2.23872e-08	2.51189e-31	2.24404e-23	5.01187e-16	-7.00272e-16	-1.564e-08	-1.564e-08
7.66	2.18776e-08	2.29087e-31	2.09426e-23	4.7863e-16	-6.84332e-16	-1.564e-08	-1.564e-08
7.67	2.13796e-08	2.0893e-31	1.95447e-23	4.57088e-16	-6.68755e-16	-1.564e-08	-1.564e-08
7.68	2.0893e-08	1.90546e-31	1.82402e-23	4.36516e-16	-6.53532e-16	-1.564e-08	-1.564e-08
7.69	2.04174e-08	1.7378e-31	1.70228e-23	4.16869e-16	-6.38656e-16	-1.564e-08	-1.564e-08
7.7	1.99526e-08	1.58489e-31	1.58866e-23	3.98107e-16	-6.24118e-16	-1.564e-08	-1.564e-08
7.71	1.94984e-08	1.44544e-31	1.48262e-23	3.80189e-16	-6.09912e-16	-1.564e-08	-1.564e-08
7.72	1.90546e-08	1.31826e-31	1.38366e-23	3.63078e-16	-5.96028e-16	-1.564e-08	-1.564e-08
7.73	1.86209e-08	1.20226e-31	1.29131e-23	3.46737e-16	-5.82461e-16	-1.564e-08	-1.564e-08
7.74	1.8197e-08	1.09648e-31	1.20512e-23	3.31131e-16	-5.69203e-16	-1.564e-08	-1.564e-08
7.75	1.77828e-08	1e-31	1.12468e-23	3.16228e-16	-5.56246e-16	-1.564e-08	-1.564e-08
7.76	1.7378e-08	9.12011e-32	1.04961e-23	3.01995e-16	-5.43584e-16	-1.564e-08	-1.564e-08
7.77	1.69824e-08	8.31764e-32	9.79558e-24	2.88403e-16	-5.31211e-16	-1.564e-08	-1.564e-08
7.78	1.65959e-08	7.58578e-32	9.14176e-24	2.75423e-16	-5.19119e-16	-1.564e-08	-1.564e-08
7.79	1.62181e-08	6.91831e-32	8.53159e-24	2.63027e-16	-5.07303e-16	-1.564e-08	-1.564e-08
7.8	1.58489e-08	6.30957e-32	7.96214e-24	2.51189e-16	-4.95755e-16	-1.564e-08	-1.564e-08
7.81	1.54882e-08	5.7544e-32	7.4307e-24	2.39883e-16	-4.8447e-16	-1.564e-08	-1.564e-08
7.82	1.51356e-08	5.24807e-32	6.93474e-24	2.29087e-16	-4.73442e-16	-1.564e-08	-1.564e-08
7.83	1.47911e-08	4.7863e-32	6.47187e-24	2.18776e-16	-4.62665e-16	-1.564e-08	-1.564e-08
7.84	1.44544e-08	4.36516e-32	6.0399e-24	2.0893e-16	-4.52134e-16	-1.564e-08	-1.564e-08
7.85	1.41254e-08	3.98107e-32	5.63677e-24	1.99526e-16	-4.41842e-16	-1.564e-08	-1.564e-08
7.86	1.38038e-08	3.63078e-32	5.26054e-24	1.90546e-16	-4.31784e-16	-1.564e-08	-1.564e-08
7.87	1.34896e-08	3.31131e-32	4.90942e-24	1.8197e-16	-4.21956e-16	-1.564e-08	-1.564e-08
7.88	1.31826e-08	3.01995e-32	4.58174e-24	1.7378e-16	-4.12351e-16	-1.564e-08	-1.564e-08
7.89	1.28825e-08	2.75423e-32	4.27592e-24	1.65959e-16	-4.02965e-16	-1.564e-08	-1.564e-08
7.9	1.25893e-08	2.51189e-32	3.99052e-24	1.58489e-16	-3.93792e-16	-1.564e-08	-1.564e-08
7.91	1.23027e-08	2.29087e-32	3.72417e-24	1.51356e-16	-3.84828e-16	-1.564e-08	-1.564e-08
7.92	1.20226e-08	2.0893e-32	3.4756e-24	1.44544e-16	-3.76069e-16	-1.564e-08	-1.564e-08
7.93	1.1749e-08	1.90546e-32	3.24362e-24	1.38038e-16	-3.67508e-16	-1.564e-08	-1.564e-08
7.94	1.14815e-08	1.7378e-32	3.02712e-24	1.31826e-16	-3.59143e-16	-1.564e-08	-1.564e-08
7.95	1.12202e-08	1.58489e-32	2.82508e-24	1.25893e-16	-3.50968e-16	-1.564e-08	-1.564e-08
7.96	1.09648e-08	1.44544e-32	2.63651e-24	1.20226e-16	-3.42979e-16	-1.564e-08	-1.564e-08
7.97	1.07152e-08	1.31826e-32	2.46054e-24	1.14815e-16	-3.35171e-16	-1.564e-08	-1.564e-08
7.98	1.04713e-08	1.20226e-32	2.29631e-24	1.09648e-16	-3.27542e-16	-1.564e-08	-1.564e-08
7.99	1.02329e-08	1.09648e-32	2.14304e-24	1.04713e-16	-3.20086e-16	-1.564e-08	-1.564e-08
8	1e-08	1e-32	2e-24	1e-16	-3.128e-16	-1.564e-08	-1.564e-08
8.01	9.77237e-09	9.12011e-33	1.86651e-24	9.54993e-17	-3.0568e-16	-1.564e-08	-1.564e-08
8.02	9.54993e-09	8.31764e-33	1.74193e-24	9.12011e-17	-2.98722e-16	-1.564e-08	-1.564e-08
8.03	9.33254e-09	7.58578e-33	1.62566e-24	8.70964e-17	-2.91922e-16	-1.564e-08	-1.564e-08
8.04	9.12011e-09	6.91831e-33	1.51716e-24	8.31764e-17	-2.85277e-16	-1.564e-08	-1.564e-08
8.05	8.91251e-09	6.30957e-33	1.41589e-24	7.94328e-17	-2.78783e-16	-1.564e-08	-1.564e-08
8.06	8.70964e-09	5.7544e-33	1.32139e-24	7.58578e-17	-2.72438e-16	-1.564e-08	-1.564e-08
8.07	8.51138e-09	5.24807e-33	1.23319e-24	7.24436e-17	-2.66236e-16	-1.564e-08	-1.564e-08
8.08	8.31764e-09	4.7863e-33	1.15088e-24	6.91831e-17	-2.60176e-16	-1.564e-08	-1.564e-08
8.09	8.12831e-09	4.36516e-33	1.07406e-24	6.60693e-17	-2.54254e-16	-1.564e-08	-1.564e-08
8.1	7.94328e-09	3.98107e-33	1.00237e-24	6.30957e-17	-2.48466e-16	-1.564e-08	-1.564e-08
8.11	7.76247e-09	3.63078e-33	9.3547e-25	6.0256e-17	-2.4281e-16	-1.564e-08	-1.564e-08
8.12	7.58578e-09	3.31131e-33	8.73032e-25	5.7544e-17	-2.37283e-16	-1.564e-08	-1.564e-08
8.13	7.4131e-09	3.01995e-33	8.14761e-25	5.49541e-17	-2.31882e-16	-1.564e-08	-1.564e-08
8.14	7.24436e-09	2.75423e-33	7.60379e-25	5.24807e-17	-2.26604e-16	-1.564e-08	-1.564e-08
8.15	7.07946e-09	2.51189e-33	7.09627e-25	5.01187e-17	-2.21446e-16	-1.564e-08	-1.564e-08
8.16	6.91831e-09	2.29087e-33	6.62262e-25	4.7863e-17	-2.16405e-16	-1.564e-08	-1.564e-08
8.17	6.76083e-09	2.0893e-33	6.18059e-25	4.57088e-17	-2.11479e-16	-1.564e-08	-1.564e-08
8.18	6.60693e-09	1.90546e-33	5.76806e-25	4.36516e-17	-2.06665e-16	-1.564e-08	-1.564e-08
8.19	6.45654e-09	1.7378e-33	5.38307e-25	4.16869e-17	-2.01961e-16	-1.564e-08	-1.564e-08
8.2	6.30957e-09	1.58489e-33	5.02377e-25	3.98107e-17	-1.97364e-16	-1.564e-08	-1.564e-08
8.21	6.16595e-09	1.44544e-33	4.68846e-25	3.80189e-17	-1.92871e-16	-1.564e-08	-1.564e-08
8.22	6.0256e-09	1.31826e-33	4.37552e-25	3.63078e-17	-1.88481e-16	-1.564e-08	-1.564e-08
8.23	5.88844e-09	1.20226e-33	4.08348e-25	3.46737e-17	-1.8419e-16	-1.564e-08	-1.564e-08
8.24	5.7544e-09	1.09648e-33	3.81092e-25	3.31131e-17	-1.79998e-16	-1.564e-08	-1.564e-08
8.25	5.62341e-09	1e-33	3.55656e-25	3.16228e-17	-1.759e-16	-1.564e-08	-1.564e-08
8.26	5.49541e-09	9.12011e-34	3.31917e-25	3.01995e-17	-1.71896e-16	-1.564e-08	-1.564e-08
8.27	5.37032e-09	8.31764e-34	3.09763e-25	2.88403e-17	-1.67984e-16	-1.564e-08	-1.564e-08
8.28	5.24807e-09	7.58578e-34	2.89088e-25	2.75423e-17	-1.6416e-16	-1.564e-08	-1.564e-08
8.29	5.12861e-09	6.91831e-34	2.69793e-25	2.63027e-17	-1.60423e-16	-1.564e-08	-1.564e-08
8.3	5.01187e-09	6.30957e-34	2.51785e-25	2.51189e-17	-1.56771e-16	-1.564e-08	-1.564e-08
8.31	4.89779e-09	5.7544e-34	2.3498e-25	2.39883e-17	-1.53203e-16	-1.564e-08	-1.564e-08
8.32	4.7863e-09	5.24807e-34	2.19296e-25	2.29087e-17	-1.49716e-16	-1.564e-08	-1.564e-08
8.33	4.67735e-09	4.7863e-34	2.04659e-25	2.18776e-17	-1.46308e-16	-1.564e-08	-1.564e-08
8.34	4.57088e-09	4.36516e-34	1.90999e-25	2.0893e-17	-1.42977e-16	-1.564e-08	-1.564e-08
8.35	4.46684e-09	3.98107e-34	1.7825e-25	1.99526e-17	-1.39723e-16	-1.564e-08	-1.564e-08
8.36	4.36516e-09	3.63078e-34	1.66353e-25	1.90546e-17	-1.36542e-16	-1.564e-08	-1.564e-08
8.37	4.2658e-09	3.31131e-34	1.55249e-25	1.8197e-17	-1.33434e-16	-1.564e-08	-1.564e-08
8.38	4.16869e-09	3.01995e-34	1.44887e-25	1.7378e-17	-1.30397e-16	-1.564e-08	-1.564e-08
8.39	4.0738e-09	2.75423e-34	1.35217e-25	1.65959e-17	-1.27429e-16	-1.564e-08	-1.564e-08
8.4	3.98107e-09	2.51189e-34	1.26191e-25	1.58489e-17	-1.24528e-16	-1.564e-08	-1.564e-08
8.41	3.89045e-09	2.29087e-34	1.17769e-25	1.51356e-17	-1.21693e-16	-1.564e-08	-1.564e-08
8.42	3.80189e-09	2.0893e-34	1.09908e-25	1.44544e-17	-1.18923e-16	-1.564e-08	-1.564e-08
8.43	3.71535e-09	1.90546e-34	1.02572e-25	1.38038e-17	-1.16216e-16	-1.564e-08	-1.564e-08
8.44	3.63078e-09	1.7378e-34	9.5726e-26	1.31826e-17	-1.13571e-16	-1.564e-08	-1.564e-08
8.45	3.54813e-09	1.58489e-34	8.93367e-26	1.25893e-17	-1.10986e-16	-1.564e-08	-1.564e-08
8.46	3.46737e-09	1.44544e-34	8.33739e-26	1.20226e-17	-1.08459e-16	-1.564e-08	-1.564e-08
8.47	3.38844e-09	1.31826e-34	7.7809e-26	1.14815e-17	-1.05991e-16	-1.564e-08	-1.564e-08
8.48	3.31131e-09	1.20226e-34	7.26156e-26	1.09648e-17	-1.03578e-16	-1.564e-08	-1.564e-08
8.49	3.23594e-09	1.09648e-34	6.77688e-26	1.04713e-17	-1.0122e-16	-1.564e-08	-1.564e-08
8.5	3.16228e-09	1e-34	6.32456e-26	1e-17	-9.89161e-17	-1.564e-08	-1.564e-08
8.51	3.0903e-09	9.12011e-35	5.90242e-26	9.54993e-18	-9.66645e-17	-1.564e-08	-1.564e-08
8.52	3.01995e-09	8.31764e-35	5.50846e-26	9.12011e-18	-9.44642e-17	-1.564e-08	-1.564e-08
8.53	2.95121e-09	7.58578e-35	5.14079e-26	8.70964e-18	-9.23139e-17	-1.564e-08	-1.564e-08
8.54	2.88403e-09	6.91831e-35	4.79767e-26	8.31764e-18	-9.02126e-17	-1.564e-08	-1.564e-08
8.55	2.81838e-09	6.30957e-35	4.47744e-26	7.94328e-18	-8.81591e-17	-1.564e-08	-1.564e-08
8.56	2.75423e-09	5.7544e-35	4.17859e-26	7.58578e-18	-8.61523e-17	-1.564e-08	-1.564e-08
8.57	2.69153e-09	5.24807e-35	3.89969e-26	7.24436e-18	-8.41913e-17	-1.564e-08	-1.564e-08
8.58	2.63027e-09	4.7863e-35	3.6394e-26	6.91831e-18	-8.22748e-17	-1.564e-08	-1.564e-08
8.59	2.5704e-09	4.36516e-35	3.39649e-26	6.60693e-18	-8.0402e-17	-1.564e-08	-1.564e-08
8.6	2.51189e-09	3.98107e-35	3.16979e-26	6.30957e-18	-7.85719e-17	-1.564e-08	-1.564e-08
8.61	2.45471e-09	3.63078e-35	2.95822e-26	6.0256e-18	-7.67833e-17	-1.564e-08	-1.564e-08
8.62	2.39883e-09	3.31131e-35	2.76077e-26	5.7544e-18	-7.50355e-17	-1.564e-08	-1.564e-08
8.63	2.34423e-09	3.01995e-35	2.5765e-26	5.49541e-18	-7.33275e-17	-1.564e-08	-1.564e-08
8.64	2.29087e-09	2.75423e-35	2.40453e-26	5.24807e-18	-7.16584e-17	-1.564e-08	-1.564e-08
8.65	2.23872e-09	2.51189e-35	2.24404e-26	5.01187e-18	-7.00272e-17	-1.564e-08	-1.564e-08
8.66	2.18776e-09	2.29087e-35	2.09426e-26	4.7863e-18	-6.84332e-17	-1.564e-08	-1.564e-08
8.67	2.13796e-09	2.0893e-35	1.95447e-26	4.57088e-18	-6.68755e-17	-1.564e-08	-1.564e-08
8.68	2.0893e-09	1.90546e-35	1.82402e-26	4.36516e-18	-6.53532e-17	-1.564e-08	-1.564e-08
8.69	2.04174e-09	1.7378e-35	1.70228e-26	4.16869e-18	-6.38656e-17	-1.564e-08	-1.564e-08
8.7	1.99526e-09	1.58489e-35	1.58866e-26	3.98107e-18	-6.24118e-17	-1.564e-08	-1.564e-08
8.71	1.94984e-09	1.44544e-35	1.48262e-26	3.80189e-18	-6.09912e-17	-1.564e-08	-1.564e-08
8.72	1.90546e-09	1.31826e-35	1.38366e-26	3.63078e-18	-5.96028e-17	-1.564e-08	-1.564e-08
8.73	1.86209e-09	1.20226e-35	1.29131e-26	3.46737e-18	-5.82461e-17	-1.564e-08	-1.564e-08
8.74	1.8197e-09	1.09648e-35	1.20512e-26	3.31131e-18	-5.69203e-17	-1.564e-08	-1.564e-08
8.75	1.77828e-09	1e-35	1.12468e-26	3.16228e-18	-5.56246e-17	-1.564e-08	-1.564e-08
8.76	1.7378e-09	9.12011e-36	1.04961e-26	3.01995e-18	-5.43584e-17	-1.564e-08	-1.564e-08
8.77	1.69824e-09	8.31764e-36	9.79558e-27	2.88403e-18	-5.31211e-17	-1.564e-08	-1.564e-08
8.78	1.65959e-09	7.58578e-36	9.14176e-27	2.75423e-18	-5.19119e-17	-1.564e-08	-1.564e-08
8.79	1.62181e-09	6.91831e-36	8.53159e-27	2.63027e-18	-5.07303e-17	-1.564e-08	-1.564e-08
8.8	1.58489e-09	6.30957e-36	7.96214e-27	2.51189e-18	-4.95755e-17	-1.564e-08	-1.564e-08
8.81	1.54882e-09	5.7544e-36	7.4307e-27	2.39883e-18	-4.8447e-17	-1.564e-08	-1.564e-08
8.82	1.51356e-09	5.24807e-36	6.93474e-27	2.29087e-18	-4.73442e-17	-1.564e-08	-1.564e-08
8.83	1.47911e-09	4.7863e-36	6.47187e-27	2.18776e-18	-4.62665e-17	-1.564e-08	-1.564e-08
8.84	1.44544e-09	4.36516e-36	6.0399e-27	2.0893e-18	-4.52134e-17	-1.564e-08	-1.564e-08
8.85	1.41254e-09	3.98107e-36	5.63677e-27	1.99526e-18	-4.41842e-17	-1.564e-08	-1.564e-08
8.86	1.38038e-09	3.63078e-36	5.26054e-27	1.90546e-18	-4.31784e-17	-1.564e-08	-1.564e-08
8.87	1.34896e-09	3.31131e-36	4.90942e-27	1.8197e-18	-4.21956e-17	-1.564e-08	-1.564e-08
8.88	1.31826e-09	3.01995e-36	4.58174e-27	1.7378e-18	-4.12351e-17	-1.564e-08	-1.564e-08
8.89	1.28825e-09	2.75423e-36	4.27592e-27	1.65959e-18	-4.02965e-17	-1.564e-08	-1.564e-08
8.9	1.25893e-09	2.51189e-36	3.99052e-27	1.58489e-18	-3.93792e-17	-1.564e-08	-1.564e-08
8.91	1.23027e-09	2.29087e-36	3.72417e-27	1.51356e-18	-3.84828e-17	-1.564e-08	-1.564e-08
8.92	1.20226e-09	2.0893e-36	3.4756e-27	1.44544e-18	-3.76069e-17	-1.564e-08	-1.564e-08
8.93	1.1749e-09	1.90546e-36	3.24362e-27	1.38038e-18	-3.67508e-17	-1.564e-08	-1.564e-08
8.94	1.14815e-09	1.7378e-36	3.02712e-27	1.31826e-18	-3.59143e-17	-1.564e-08	-1.564e-08
8.95	1.12202e-09	1.58489e-36	2.82508e-27	1.25893e-18	-3.50968e-17	-1.564e-08	-1.564e-08
8.96	1.09648e-09	1.44544e-36	2.63651e-27	1.20226e-18	-3.42979e-17	-1.564e-08	-1.564e-08
8.97	1.07152e-09	1.31826e-36	2.46054e-27	1.14815e-18	-3.35171e-17	-1.564e-08	-1.564e-08
8.98	1.04713e-09	1.20226e-36	2.29631e-27	1.09648e-18	-3.27542e-17	-1.564e-08	-1.564e-08
8.99	1.02329e-09	1.09648e-36	2.14304e-27	1.04713e-18	-3.20086e-17	-1.564e-08	-1.564e-08
9	1e-09	1e-36	2e-27	1e-18	-3.128e-17	-1.564e-08	-1.564e-08
9.01	9.77237e-10	9.12011e-37	1.86651e-27	9.54993e-19	-3.0568e-17	-1.564e-08	-1.564e-08
9.02	9.54993e-10	8.31764e-37	1.74193e-27	9.12011e-19	-2.98722e-17	-1.564e-08	-1.564e-08
9.03	9.33254e-10	7.58578e-37	1.62566e-27	8.70964e-19	-2.91922e-17	-1.564e-08	-1.564e-08
9.04	9.12011e-10	6.91831e-37	1.51716e-27	8.31764e-19	-2.85277e-17	-1.564e-08	-1.564e-08
9.05	8.91251e-10	6.30957e-37	1.41589e-27	7.94328e-19	-2.78783e-17	-1.564e-08	-1.564e-08
9.06	8.70964e-10	5.7544e-37	1.32139e-27	7.58578e-19	-2.72438e-17	-1.564e-08	-1.564e-08
9.07	8.51138e-10	5.24807e-37	1.23319e-27	7.24436e-19	-2.66236e-17	-1.564e-08	-1.564e-08
9.08	8.31764e-10	4.7863e-37	1.15088e-27	6.91831e-19	-2.60176e-17	-1.564e-08	-1.564e-08
9.09	8.12831e-10	4.36516e-37	1.07406e-27	6.60693e-19	-2.54254e-17	-1.564e-08	-1.564e-08
9.1	7.94328e-10	3.98107e-37	1.00237e-27	6.30957e-19	-2.48466e-17	-1.564e-08	-1.564e-08
9.11	7.76247e-10	3.63078e-37	9.3547e-28	6.0256e-19	-2.4281e-17	-1.564e-08	-1.564e-08
9.12	7.58578e-10	3.31131e-37	8.73032e-28	5.7544e-19	-2.37283e-17	-1.564e-08	-1.564e-08
9.13	7.4131e-10	3.01995e-37	8.14761e-28	5.49541e-19	-2.31882e-17	-1.564e-08	-1.564e-08
9.14	7.24436e-10	2.75423e-37	7.60379e-28	5.24807e-19	-2.26604e-17	-1.564e-08	-1.564e-08
9.15	7.07946e-10	2.51189e-37	7.09627e-28	5.01187e-19	-2.21446e-17	-1.564e-08	-1.564e-08
9.16	6.91831e-10	2.29087e-37	6.62262e-28	4.7863e-19	-2.16405e-17	-1.564e-08	-1.564e-08
9.17	6.76083e-10	2.0893e-37	6.18059e-28	4.57088e-19	-2.11479e-17	-1.564e-08	-1.564e-08
9.18	6.60693e-10	1.90546e-37	5.76806e-28	4.36516e-19	-2.06665e-17	-1.564e-08	-1.564e-08
9.19	6.45654e-10	1.7378e-37	5.38307e-28	4.16869e-19	-2.01961e-17	-1.564e-08	-1.564e-08
9.2	6.30957e-10	1.58489e-37	5.02377e-28	3.98107e-19	-1.97364e-17	-1.564e-08	-1.564e-08
9.21	6.16595e-10	1.44544e-37	4.68846e-28	3.80189e-19	-1.92871e-17	-1.564e-08	-1.564e-08
9.22	6.0256e-10	1.31826e-37	4.37552e-28	3.63078e-19	-1.88481e-17	-1.564e-08	-1.564e-08
9.23	5.88844e-10	1.20226e-37	4.08348e-28	3.46737e-19	-1.8419e-17	-1.564e-08	-1.564e-08
9.24	5.7544e-10	1.09648e-37	3.81092e-28	3.31131e-19	-1.79998e-17	-1.564e-08	-1.564e-08
9.25	5.62341e-10	1e-37	3.55656e-28	3.16228e-19	-1.759e-17	-1.564e-08	-1.564e-08
9.26	5.49541e-10	9.12011e-38	3.31917e-28	3.01995e-19	-1.71896e-17	-1.564e-08	-1.564e-08
9.27	5.37032e-10	8.31764e-38	3.09763e-28	2.88403e-19	-1.67984e-17	-1.564e-08	-1.564e-08
9.28	5.24807e-10	7.58578e-38	2.89088e-28	2.75423e-19	-1.6416e-17	-1.564e-08	-1.564e-08
9.29	5.12861e-10	6.91831e-38	2.69793e-28	2.63027e-19	-1.60423e-17	-1.564e-08	-1.564e-08
9.3	5.01187e-10	6.30957e-38	2.51785e-28	2.51189e-19	-1.56771e-17	-1.564e-08	-1.564e-08
9.31	4.89779e-10	5.7544e-38	2.3498e-28	2.39883e-19	-1.53203e-17	-1.564e-08	-1.564e-08
9.32	4.7863e-10	5.24807e-38	2.19296e-28	2.29087e-19	-1.49716e-17	-1.564e-08	-1.564e-08
9.33	4.67735e-10	4.7863e-38	2.04659e-28	2.18776e-19	-1.46308e-17	-1.564e-08	-1.564e-08
9.34	4.57088e-10	4.36516e-38	1.90999e-28	2.0893e-19	-1.42977e-17	-1.564e-08	-1.564e-08
9.35	4.46684e-10	3.98107e-38	1.7825e-28	1.99526e-19	-1.39723e-17	-1.564e-08	-1.564e-08
9.36	4.36516e-10	3.63078e-38	1.66353e-28	1.90546e-19	-1.36542e-17	-1.564e-08	-1.564e-08
9.37	4.2658e-10	3.31131e-38	1.55249e-28	1.8197e-19	-1.33434e-17	-1.564e-08	-1.564e-08
9.38	4.16869e-10	3.01995e-38	1.44887e-28	1.7378e-19	-1.30397e-17	-1.564e-08	-1.564e-08
9.39	4.0738e-10	2.75423e-38	1.35217e-28	1.65959e-19	-1.27429e-17	-1.564e-08	-1.564e-08
9.4	3.98107e-10	2.51189e-38	1.26191e-28	1.58489e-19	-1.24528e-17	-1.564e-08	-1.564e-08
9.41	3.89045e-10	2.29087e-38	1.17769e-28	1.51356e-19	-1.21693e-17	-1.564e-08	-1.564e-08
9.42	3.80189e-10	2.0893e-38	1.09908e-28	1.44544e-19	-1.18923e-17	-1.564e-08	-1.564e-08
9.43	3.71535e-10	1.90546e-38	1.02572e-28	1.38038e-19	-1.16216e-17	-1.564e-08	-1.564e-08
9.44	3.63078e-10	1.7378e-38	9.5726e-29	1.31826e-19	-1.13571e-17	-1.564e-08	-1.564e-08
9.45	3.54813e-10	1.58489e-38	8.93367e-29	1.25893e-19	-1.10986e-17	-1.564e-08	-1.564e-08
9.46	3.46737e-10	1.44544e-38	8.33739e-29	1.20226e-19	-1.08459e-17	-1.564e-08	-1.564e-08
9.47	3.38844e-10	1.31826e-38	7.7809e-29	1.14815e-19	-1.05991e-17	-1.564e-08	-1.564e-08
9.48	3.31131e-10	1.20226e-38	7.26156e-29	1.09648e-19	-1.03578e-17	-1.564e-08	-1.564e-08
9.49	3.23594e-10	1.09648e-38	6.77688e-29	1.04713e-19	-1.0122e-17	-1.564e-08	-1.564e-08
9.5	3.16228e-10	1e-38	6.32456e-29	1e-19	-9.89161e-18	-1.564e-08	-1.564e-08
9.51	3.0903e-10	9.12011e-39	5.90242e-29	9.54993e-20	-9.66645e-18	-1.564e-08	-1.564e-08
9.52	3.01995e-10	8.31764e-39	5.50846e-29	9.12011e-20	-9.44642e-18	-1.564e-08	-1.564e-08
9.53	2.95121e-10	7.58578e-39	5.14079e-29	8.70964e-20	-9.23139e-18	-1.564e-08	-1.564e-08
9.54	2.88403e-10	6.91831e-39	4.79767e-29	8.31764e-20	-9.02126e-18	-1.564e-08	-1.564e-08
9.55	2.81838e-10	6.30957e-39	4.47744e-29	7.94328e-20	-8.81591e-18	-1.564e-08	-1.564e-08
9.56	2.75423e-10	5.7544e-39	4.17859e-29	7.58578e-20	-8.61523e-18	-1.564e-08	-1.564e-08
9.57	2.69153e-10	5.24807e-39	3.89969e-29	7.24436e-20	-8.41913e-18	-1.564e-08	-1.564e-08
9.58	2.63027e-10	4.7863e-39	3.6394e-29	6.91831e-20	-8.22748e-18	-1.564e-08	-1.564e-08
9.59	2.5704e-10	4.36516e-39	3.39649e-29	6.60693e-20	-8.0402e-18	-1.564e-08	-1.564e-08
9.6	2.51189e-10	3.98107e-39	3.16979e-29	6.30957e-20	-7.85719e-18	-1.564e-08	-1.564e-08
9.61	2.45471e-10	3.63078e-39	2.95822e-29	6.0256e-20	-7.67833e-18	-1.564e-08	-1.564e-08
9.62	2.39883e-10	3.31131e-39	2.76077e-29	5.7544e-20	-7.50355e-18	-1.564e-08	-1.564e-08
9.63	2.34423e-10	3.01995e-39	2.5765e-29	5.49541e-20	-7.33275e-18	-1.564e-08	-1.564e-08
9.64	2.29087e-10	2.75423e-39	2.40453e-29	5.24807e-20	-7.16584e-18	-1.564e-08	-1.564e-08
9.65	2.23872e-10	2.51189e-39	2.24404e-29	5.01187e-20	-7.00272e-18	-1.564e-08	-1.564e-08
9.66	2.18776e-10	2.29087e-39	2.09426e-29	4.7863e-20	-6.84332e-18	-1.564e-08	-1.564e-08
9.67	2.13796e-10	2.0893e-39	1.95447e-29	4.57088e-20	-6.68755e-18	-1.564e-08	-1.564e-08
9.68	2.0893e-10	1.90546e-39	1.82402e-29	4.36516e-20	-6.53532e-18	-1.564e-08	-1.564e-08
9.69	2.04174e-10	1.7378e-39	1.70228e-29	4.16869e-20	-6.38656e-18	-1.564e-08	-1.564e-08
9.7	1.99526e-10	1.58489e-39	1.58866e-29	3.98107e-20	-6.24118e-18	-1.564e-08	-1.564e-08
9.71	1.94984e-10	1.44544e-39	1.48262e-29	3.80189e-20	-6.09912e-18	-1.564e-08	-1.564e-08
9.72	1.90546e-10	1.31826e-39	1.38366e-29	3.63078e-20	-5.96028e-18	-1.564e-08	-1.564e-08
9.73	1.86209e-10	1.20226e-39	1.29131e-29	3.46737e-20	-5.82461e-18	-1.564e-08	-1.564e-08
9.74	1.8197e-10	1.09648e-39	1.20512e-29	3.31131e-20	-5.69203e-18	-1.564e-08	-1.564e-08
9.75	1.77828e-10	1e-39	1.12468e-29	3.16228e-20	-5.56246e-18	-1.564e-08	-1.564e-08
9.76	1.7378e-10	9.12011e-40	1.04961e-29	3.01995e-20	-5.43584e-18	-1.564e-08	-1.564e-08
9.77	1.69824e-10	8.31764e-40	9.79558e-30	2.88403e-20	-5.31211e-18	-1.564e-08	-1.564e-08
9.78	1.65959e-10	7.58578e-40	9.14176e-30	2.75423e-20	-5.19119e-18	-1.564e-08	-1.564e-08
9.79	1.62181e-10	6.91831e-40	8.53159e-30	2.63027e-20	-5.07303e-18	-1.564e-08	-1.564e-08
9.8	1.58489e-10	6.30957e-40	7.96214e-30	2.51189e-20	-4.95755e-18	-1.564e-08	-1.564e-08
9.81	1.54882e-10	5.7544e-40	7.4307e-30	2.39883e-20	-4.8447e-18	-1.564e-08	-1.564e-08
9.82	1.51356e-10	5.24807e-40	6.93474e-30	2.29087e-20	-4.73442e-18	-1.564e-08	-1.564e-08
9.83	1.47911e-10	4.7863e-40	6.47187e-30	2.18776e-20	-4.62665e-18	-1.564e-08	-1.564e-08
9.84	1.44544e-10	4.36516e-40	6.0399e-30	2.0893e-20	-4.52134e-18	-1.564e-08	-1.564e-08
9.85	1.41254e-10	3.98107e-40	5.63677e-30	1.99526e-20	-4.41842e-18	-1.564e-08	-1.564e-08
9.86	1.38038e-10	3.63078e-40	5.26054e-30	1.90546e-20	-4.31784e-18	-1.564e-08	-1.564e-08
9.87	1.34896e-10	3.31131e-40	4.90942e-30	1.8197e-20	-4.21956e-18	-1.564e-08	-1.564e-08
9.88	1.31826e-10	3.01995e-40	4.58174e-30	1.7378e-20	-4.12351e-18	-1.564e-08	-1.564e-08
9.89	1.28825e-10	2.75423e-40	4.27592e-30	1.65959e-20	-4.02965e-18	-1.564e-08	-1.564e-08
9.9	1.25893e-10	2.51189e-40	3.99052e-30	1.58489e-20	-3.93792e-18	-1.564e-08	-1.564e-08
9.91	1.23027e-10	2.29087e-40	3.72417e-30	1.51356e-20	-3.84828e-18	-1.564e-08	-1.564e-08
9.92	1.20226e-10	2.0893e-40	3.4756e-30	1.44544e-20	-3.76069e-18	-1.564e-08	-1.564e-08
9.93	1.1749e-10	1.90546e-40	3.24362e-30	1.38038e-20	-3.67508e-18	-1.564e-08	-1.564e-08
9.94	1.14815e-10	1.7378e-40	3.02712e-30	1.31826e-20	-3.59143e-18	-1.564e-08	-1.564e-08
9.95	1.12202e-10	1.58489e-40	2.82508e-30	1.25893e-20	-3.50968e-18	-1.564e-08	-1.564e-08
9.96	1.09648e-10	1.44544e-40	2.63651e-30	1.20226e-20	-3.42979e-18	-1.564e-08	-1.564e-08
9.97	1.07152e-10	1.31826e-40	2.46054e-30	1.14815e-20	-3.35171e-18	-1.564e-08	-1.564e-08
9.98	1.04713e-10	1.20226e-40	2.29631e-30	1.09648e-20	-3.27542e-18	-1.564e-08	-1.564e-08
9.99	1.02329e-10	1.09648e-40	2.14304e-30	1.04713e-20	-3.20086e-18	-1.564e-08	-1.564e-08
10	1e-10	1e-40	2e-30	1e-20	-3.128e-18	-1.564e-08	-1.564e-08
10.01	9.77237e-11	9.12011e-41	1.86651e-30	9.54993e-21	-3.0568e-18	-1.564e-08	-1.564e-08
10.02	9.54993e-11	8.31764e-41	1.74193e-30	9.12011e-21	-2.98722e-18	-1.564e-08	-1.564e-08
10.03	9.33254e-11	7.58578e-41	1.62566e-30	8.70964e-21	-2.91922e-18	-1.564e-08	-1.564e-08
10.04	9.12011e-11	6.91831e-41	1.51716e-30	8.31764e-21	-2.85277e-18	-1.564e-08	-1.564e-08
10.05	8.91251e-11	6.30957e-41	1.41589e-30	7.94328e-21	-2.78783e-18	-1.564e-08	-1.564e-08
10.06	8.70964e-11	5.7544e-41	1.32139e-30	7.58578e-21	-2.72438e-18	-1.564e-08	-1.564e-08
10.07	8.51138e-11	5.24807e-41	1.23319e-30	7.24436e-21	-2.66236e-18	-1.564e-08	-1.564e-08
10.08	8.31764e-11	4.7863e-41	1.15088e-30	6.91831e-21	-2.60176e-18	-1.564e-08	-1.564e-08
10.09	8.12831e-11	4.36516e-41	1.07406e-30	6.60693e-21	-2.54254e-18	-1.564e-08	-1.564e-08
